# Mechanism and inhibition of SARS-CoV-2 PLpro

Theresa Klemm<sup>1</sup>, Gregor Ebert<sup>1</sup>, Dale J. Calleja<sup>1</sup>, Cody C. Allison<sup>1</sup>, Lachlan W. Richardson<sup>1</sup>, Jonathan P. Bernardini<sup>1,2</sup>, Bernadine G. C. Lu<sup>1</sup>, Nathan W. Kuchel<sup>1</sup>, Christoph Grohmann<sup>1</sup>, Yuri Shibata<sup>1</sup>, Zhong Yan Gan<sup>1</sup>, James P. Cooney<sup>1</sup>, Marcel Doerflinger<sup>1</sup>, Amanda E. Au<sup>1</sup>, Timothy R. Blackmore<sup>1</sup>, Paul P. Geurink<sup>3</sup>, Huib Ovaa<sup>3</sup>, Janet Newman<sup>4</sup>, Alan Riboldi-Tunnickliffe<sup>5</sup>, Peter E. Czabotar<sup>1</sup>, Jeffrey P. Mitchell<sup>1</sup>, Rebecca Feltham<sup>1</sup>, Bernhard C. Lechtenberg<sup>1</sup>, Kym N. Lowes<sup>1</sup>, Grant Dewson<sup>1</sup>, Marc Pellegrini<sup>1,\*</sup>, Guillaume Lessene<sup>1,6,\*</sup> and David Komander<sup>1,\*</sup>

<sup>1</sup> The Walter and Eliza Hall Institute of Medical Research and Department of Medical Biology, University of Melbourne, 1G Royal Parade, Melbourne, VIC 3052, Australia, Melbourne.

<sup>2</sup> Department of Biochemistry and Molecular Biology, Michael Smith Laboratories University of British Columbia, Vancouver, Canada.

<sup>3</sup> Oncode Institute and Department of Chemical Immunology, Leiden University Medical Centre, Einthovenweg 20, 2333 ZC, Leiden, The Netherlands.

<sup>4</sup> Commonwealth Scientific and Industrial Research Organisation (CSIRO), Biomedical Program, Parkville, VIC 3052, Australia.

<sup>5</sup> Australian Synchrotron, ANSTO, 800 Blackburn Road, Clayton, VIC 3168, Australia.

<sup>6</sup> Pharmacology and Therapeutics Department, University of Melbourne, Melbourne VIC 3020, Australia.

\* corresponding authors, Marc Pellegrini, [pellegrini@wehi.edu.au](mailto:pellegrini@wehi.edu.au); Guillaume Lessene, [glessene@wehi.edu.au](mailto:glessene@wehi.edu.au); David Komander, [dk@wehi.edu.au](mailto:dk@wehi.edu.au)

Word count:

Abstract – 179 words, Main text – 2654 words, Notes – 451 words, 37 references, Fig legends – 890 words, Methods – 3367 words.

9 Extended Data Figures, 1 Extended Data Table, 22 references for Methods and Extended Data, 4 Supplementary Items.

32 **Abstract**

33 **Coronaviruses, including SARS-CoV-2, encode multifunctional proteases that**  
34 **are essential for viral replication and evasion of host innate immune**  
35 **mechanisms. The papain-like protease PLpro cleaves the viral polyprotein, and**  
36 **reverses inflammatory ubiquitin and anti-viral ubiquitin-like ISG15 protein**  
37 **modifications<sup>1,2</sup>. Drugs that target SARS-CoV-2 PLpro (hereafter, SARS2**  
38 **PLpro) may hence be effective as treatments or prophylaxis for COVID-19,**  
39 **reducing viral load and reinstating innate immune responses<sup>3</sup>.**

40 **We here characterise SARS2 PLpro in molecular and biochemical detail.**

41 **SARS2 PLpro cleaves Lys48-linked polyubiquitin and ISG15 modifications with**  
42 **high activity. Structures of PLpro bound to ubiquitin and ISG15 reveal that the**  
43 **S1 ubiquitin binding site is responsible for high ISG15 activity, while the S2**  
44 **binding site provides Lys48 chain specificity and cleavage efficiency.**

45 **We further exploit two strategies to target PLpro. A repurposing approach,**  
46 **screening 3727 unique approved drugs and clinical compounds against**  
47 **SARS2 PLpro, identified no compounds that inhibited PLpro consistently or**  
48 **that could be validated in counterscreens. More promisingly, non-covalent**  
49 **small molecule SARS PLpro inhibitors were able to inhibit SARS2 PLpro with**  
50 **high potency and excellent antiviral activity in SARS-CoV-2 infection models.**

51

52 The COVID-19 pandemic unfolding globally in the first half of 2020 is caused by the  
53 novel Coronavirus SARS-CoV-2, and has highlighted, amongst many things, the  
54 general lack of antiviral small molecule drugs to fight a global coronavirus pandemic.  
55 Proteolytic enzymes are critical for viruses expressing their protein machinery as a  
56 polyprotein that requires cleavage into functional units. As a result, viruses with  
57 blocked protease activity do not replicate efficiently in cells; this concept extends to  
58 coronaviruses<sup>4</sup>. Drugging the proteases in SARS-CoV-2 is therefore a current focus  
59 of concerted global academic and pharma efforts<sup>3</sup>.

60

61 SARS-CoV-2 encodes two proteases, the papain-like protease (PLpro, encoded  
62 within non-structural protein (nsp) 3), and 3-chymotrypsin-like 'main' protease  
63 (3CLpro or Mpro, encoded within nsp5). PLpro generates nsp1, nsp2, and nsp3  
64 (**Figure 1a**) and 3CLpro generates the remaining 13 non-structural proteins. After

65 their generation, the nsps assemble the viral replicase complex on host membranes,  
66 initiating replication and transcription of the viral genome<sup>1,5</sup>.

67

68 Viral proteases can have additional functions, and can for example act to inhibit host  
69 innate immune responses that are mounted initially as an inflammatory response,  
70 and subsequently as an interferon response. The interferon system generates an  
71 antiviral state in host cells through transcriptional upregulation of more than 300  
72 interferon-stimulated genes (ISGs), to efficiently detect and respond to viral threats<sup>6</sup>.  
73 Dysregulated inflammatory responses are a hallmark of COVID-19, and substantial  
74 morbidity and mortality is associated with overzealous immune responses (a  
75 'cytokine storm'), causing collateral damage<sup>7</sup>.

76 A common mechanism by which viral proteases regulate innate immune pathways is  
77 through antagonising ubiquitin and ubiquitin-like modifications (**Figure 1a**)<sup>8,9</sup>. Protein  
78 ubiquitination is complex due to the occurrence of many ubiquitin chain architectures  
79 that encode non-degradative and degradative functions<sup>10,11</sup>. Inflammatory signalling  
80 pathways rely on distinct ubiquitin signals that are regulated by intricate mechanisms  
81 in human cells<sup>12</sup>. ISG15 is a ubiquitin-like (Ubl) modification induced upon viral  
82 infection<sup>13</sup>. ISG15 itself comprises two Ubl folds that are fused, structurally  
83 resembling diubiquitin<sup>14</sup>. Only few cellular enzymes remove ISG15, enabling this  
84 modification to act as a virus-induced danger signal. Importantly, coronaviral PLpro  
85 enzymes efficiently remove ISG15 and ubiquitin modifications, dampening  
86 inflammation and anti-viral signalling (**Figure 1a**)<sup>5,15-19</sup>. A large body of work by  
87 many laboratories has illuminated SARS and MERS PLpro mechanisms in some  
88 detail<sup>1,20</sup>, revealing two binding sites for ubiquitin/Ubl-folds (termed the S1 and S2  
89 ubiquitin binding sites, see<sup>21</sup> for nomenclature). We here extend these studies to  
90 SARS2 PLpro.

91

## 92 **Biochemical characterisation of SARS2 PLpro activity**

93 SARS2 PLpro is 83% identical to SARS PLpro (**Extended Data Fig. 1**) and is also  
94 expected to target ubiquitin and ISG15. In a fluorescence polarisation based  
95 quantitative assay<sup>22</sup>, SARS2 PLpro hydrolysed an ISG15-TAMRA fluorescent  
96 substrate 350-fold more efficiently as compared to ubiquitin-TAMRA (**Figure 1b**,  
97 **Extended Data Fig. 2a**). Strikingly, a substrate comprising only the C-terminal  
98 ubiquitin-like fold of ISG15, (ISG15<sup>CTD</sup>-TAMRA) was still cleaved with 160-fold

99 higher efficiency compared to ubiquitin (**Figure 1b, Extended Data Fig. 2a**). ISG15  
100 versus ubiquitin preference is hence mediated by recognition of one Ubl-fold, which  
101 would bind in the S1 ubiquitin/Ubl binding site of PLpro.  
102 An S2 ubiquitin binding site enables SARS PLpro to preferentially cleave Lys48-  
103 linked polyubiquitin<sup>17,20</sup>. A putative S2 site is conserved in SARS2 PLpro (**Extended**  
104 **Data Fig. 1**). Gel-based analysis of different triubiquitin chains reveals very high  
105 activity and striking Lys48-polyubiquitin specificity in SARS2 PLpro (**Figure 1c**). In  
106 fact, Lys48-triubiquitin is hydrolysed with similar activity compared to cleavage of  
107 proISG15 to mature ISG15 in gel-based assays (**Extended Data Fig. 2b-d**). Hence,  
108 while the S1 site of PLpro prefers ISG15 modifications, the S2 site reinstates efficient  
109 cleavage of Lys48-polyubiquitin to create balanced PLpro activity towards modifiers,  
110 in an elegant mechanism of attaining polyubiquitin targeting specificity<sup>21</sup>.

111

### 112 **Structural analysis of SARS2 PLpro ubiquitin and ISG15 complexes**

113 Differential cleavage of ubiquitin and ISG15<sup>CTD</sup> substrates (**Figure 1b**) indicated that  
114 the S1 PLpro interacts with both modifiers distinctly. SARS2 PLpro crystal structures  
115 covalently bound to ubiquitin-propargylamide (Ub-PA) at 2.7 Å and to ISG15<sup>CTD</sup>-PA  
116 at 2.9 Å resolution, enable direct comparison (**Figure 1d,e, Extended Data Table 1,**  
117 **Extended Data Fig. 3**). In concordance with previous structures of SARS and MERS  
118 PLpro (**Extended Data Fig. 4**), and conceptually resembling human ubiquitin  
119 specific protease (USP) enzymes<sup>21</sup>, PLpro binds ubiquitin in an ‘open hand’  
120 architecture, in which the ubiquitin sits on the ‘Palm’ subdomain, and is held in place  
121 by the zinc-binding ‘Fingers’ subdomain, such that the ubiquitin C-terminus, the site  
122 of hydrolysis, reaches into the catalytic centre (**Figure 1d, Extended Data Fig. 3a**).  
123 The structure of SARS2 PLpro, and the position and orientation of the bound  
124 ubiquitin molecule, are highly similar to SARS PLpro~Ub (pdb 4m0w, ref. <sup>23,24</sup>,  
125 RMSD of 0.54 Å for PLpro, see **Extended Data Fig. 4**).

126

127 While ISG15<sup>CTD</sup> sits similarly on the Palm subdomain, it interacts with the Thumb  
128 rather than the Fingers of SARS2 PLpro (**Figure 2a, Extended Data Fig. 5a**). The  
129 resulting ~40° rotation of the Ubl-fold  $\alpha$ -helix compared to ubiquitin, leads to shifts of  
130 up to 15 Å for structurally identical residues in the Ubl fold (**Figure 2a, Extended**  
131 **Data Fig. 5a,b**). Key interaction sites mediating ISG15<sup>CTD</sup> - PLpro contacts are



132 centred around ISG15 Trp123 and Pro130/Glu132, docking ISG15 onto the PLpro  
133  $\alpha 7$  helix (**Extended Data Fig. 5c**). These interactions dislodge the Ubl-fold from the  
134 Fingers subdomain (**Figure 2a**). While the complex resembles interaction modes  
135 observed in SARS PLpro~ISG15<sup>CTD</sup> (pdb 5tl7, <sup>25</sup>, RMSD of 0.74 Å for PLpro, see  
136 **Extended Data Fig. 4**), some interacting residues (especially, Tyr171 on helix  $\alpha 7$ )  
137 are not conserved (**Extended Data Fig. 1, 5c**), and seem to improve the contact in  
138 SARS2 PLpro. More variability is seen in MERS PLpro, which binds to ubiquitin and  
139 ISG15<sup>CTD</sup> similarly through its ability to ‘close’ the Fingers subdomain<sup>26</sup> (see  
140 discussion in **Extended Data Fig. 4**).

141  
142 Binding mode differences in the S1 ubiquitin binding site provided an opportunity to  
143 generate separation-of-function mutations (**Figure 2b,c, Extended Data Fig. 5d-f**).  
144 A general S1 site mutant, R166S/E167R <sup>20</sup> showed severely diminished activity  
145 against either modifier (**Figure 2b,c, Extended Data Fig. 5f**). PLpro N156E (and, to  
146 a lesser degree, Y171R) resulted in selective decrease of activity in ISG15 cleavage  
147 assays, with little impact on ubiquitin cleavage (**Figure 2b,c, Extended Data Fig.**  
148 **5f**). Mutations selectively impacting ubiquitin but not ISG15 were more challenging to  
149 generate but were apparent by gel-based analysis (see e.g. K232E, **Extended Data**  
150 **Fig. 5f**). Similar experiments have recently been described for MERS PLpro <sup>27</sup>.

151  
152 **Impact of the S2 ubiquitin binding site on polyubiquitin and ISG15 cleavage**  
153 Polyubiquitin cleavage in SARS2 PLpro is significantly enhanced when a longer  
154 ubiquitin chain is used (**Figure 1c, Extended Data Fig. 2b**), due to an S2 ubiquitin  
155 binding site provided by the PLpro  $\alpha 2$  helix, in which a central Phe residue interacts  
156 with the ubiquitin Ile44 patch of the distal ubiquitin in Lys48-diubiquitin (**Extended**  
157 **Data Fig. 1, 6a,b**). Consistently, SARS2 PLpro F69S mutation greatly diminished  
158 Lys48-triubiquitin cleavage, without markedly affecting ISG15<sup>CTD</sup> cleavage  
159 (**Extended Data Fig. 6c-f**). Interestingly and consistent with **Figure 1**, PLpro F69S  
160 reduces ISG15-TAMRA hydrolysis ~3-fold, i.e. to levels observed for PLpro wild-type  
161 cleavage of ISG15<sup>CTD</sup> (compare **Extended Data Fig. 6c, 2a**). A similar trend is  
162 observed by gel-based analysis (**Extended Data Fig. 6d-f**). However, in  
163 comparison, the effects of S2 site mutations on Lys48-polyubiquitin cleavage  
164 (**Extended Data Fig. 6e**), and of S1 site mutations on ISG15 cleavage (**Figure 2**,

165 **Extended Data Fig. 5f**), are more pronounced. Mutational analysis hence confirms  
166 that the S2 site is more important for providing PLpro with Lys48-polyubiquitin  
167 activity and specificity. Taken together, our data illuminate in molecular detail how  
168 SARS2 PLpro targets ubiquitin and ISG15.

169

### 170 **Repurposing known drugs to inhibit PLpro activity**

171 We next focussed our attention on the urgent matter of inhibiting PLpro, to confirm its  
172 drugability, and to provide new drug candidates with efficacy in treating COVID-19.

173 Ideally, an already clinically approved drug shows a pharmacologically relevant  
174 effect on PLpro with sub- $\mu$ M inhibitory potential, cell penetrance, oral bioavailability,  
175 and extensive safety profiles for the required dosage. Such a drug could be  
176 expedited for clinical trials.

177 A 1536-well low-volume high-throughput assay previously used to identify inhibitors  
178 of human deubiquitinases (DUBs)<sup>28</sup> was adapted for SARS2 PLpro (see **Extended**  
179 **Data Fig. 7a-c** and **Methods**). As a control for complete inhibition, the racemic  
180 version of the literature compound 5c<sup>29</sup> (here referred to as rac5c, see below), was  
181 used at 10  $\mu$ M concentration and fully inhibited PLpro (**Extended Data Fig. 7d**,  
182 orange). A curated library of 5576 compounds, comprising 3727 unique approved  
183 drugs and late-stage clinical drug candidates (listed in **Supplementary**  
184 **Information**), was screened in triplicate at 4.2  $\mu$ M drug concentration (**Figure 3a**,  
185 **Extended Data Fig. 7d-f**).

186 A set of 15 compounds showed 40-90% PLpro inhibition in each triplicate run  
187 (**Figure 3a**). Seven of these were excluded as commonly observed false-positives  
188 (reactive compounds or dyes that interfere with assays). The remaining 8  
189 compounds were tested in 10-point titration experiments for IC<sub>50</sub> measurements, as  
190 well as counterscreened against the catalytic domain of human USP21<sup>30</sup>. We chose  
191 this human protein to assess the potential selectivity of inhibition of PLpro over a  
192 representative human DUB and as counterscreen. PLpro and USP21 are sufficiently  
193 dissimilar to conclude that any compounds inhibiting both with similar IC<sub>50</sub> would  
194 likely be false positives interfering with the assay. After full titration against PLpro  
195 and USP21, we found that the 8 hits were either inactive in validation, or equally  
196 active towards PLpro and USP21 (**Figure 3b**), suggesting that none of the identified  
197 hits are genuine PLpro inhibitors. This contrasted with rac5c, which inhibited PLpro,  
198 but did not inhibit USP21 even at 100  $\mu$ M concentration (**Figure 3b**).

199 Together, our data suggests that a repurposing strategy using 3727 unique known  
200 drugs towards SARS2 PLpro is unlikely to yield drug candidates, and highlights the  
201 importance of a counterscreen in assessing the validity of hits coming from a screen  
202 of known drugs before any conclusions on their therapeutic potential can be drawn.  
203 The robust screen and orthogonal assays for PLpro will be instrumental in drug  
204 discovery campaigns.

205

### 206 **Exploiting known SARS PLpro inhibitors against SARS2 PLpro**

207 SARS PLpro has been the focus of academic drug discovery efforts in the last two  
208 decades<sup>3</sup>. An initial series of non-covalent small molecules<sup>31</sup> was subsequently  
209 refined to achieve sub- $\mu$ M inhibitors of SARS PLpro with high specificity and low  
210 cytotoxicity<sup>1,29</sup>. Drug development was aided by structural analysis of several SARS  
211 PLpro-compound complexes (**Figure 4a, Extended Data Fig. 8a,b**), showing that  
212 compounds bind in the channel occupied by the ubiquitin/ISG15 C-terminal tail,  
213 wedged between the SARS PLpro Thumb domain and a so-called Blocking Loop  
214 (BL), containing a critical Tyr residue (Tyr269 in SARS, Tyr268 in SARS2)<sup>1,29</sup>  
215 (**Figure 4a, Extended Data Fig 8a,b**). An extended, Tyr-lacking BL in MERS PLpro  
216 (**Extended Data Fig. 1**), renders it unsusceptible to some SARS inhibitors<sup>32</sup>.  
217 Importantly, the BL sequence and length, and all residues involved in inhibitor  
218 interactions, are identical between SARS and SARS2 PLpro (**Figure 4a, Extended**  
219 **Data Fig. 1, 8a,b**), suggesting that SARS PLpro inhibitors may have inhibitory  
220 potential against SARS2 PLpro.

221

222 We selected and resynthesised racemic forms of three late-stage literature  
223 compounds, named according to previous publication<sup>29</sup>, rac3j, rac3k, and rac5c (see  
224 **Supplementary Methods**). IC<sub>50</sub> measurements performed on our automated  
225 screening platform revealed low or sub- $\mu$ M inhibitory activity for each compound  
226 against SARS2 PLpro (**Figure 4b,c, Extended Data Fig. 8c,d**). This confirmed that  
227 SARS PLpro inhibitors inhibit SARS2 PLpro.

228

### 229 **SARS2 PLpro inhibitors inhibit nsp3 DUB activity**

230 Nsp3 is a 215 kDa multi-domain enzyme with several catalytic activities. To test  
231 whether rac5c would be able to inhibit the PLpro domain in context of full-length  
232 nsp3, the protein was transiently expressed from a C-terminally GFP-tagged vector

233 in HEK 293T cells. Full length nsp3 was detected with a SARS2 PLpro specific  
234 antibody (validated in **Extended Data Fig 8e**) and its activity was confirmed by  
235 proteolytic cleavage of the GFP tag (**Figure 4d, Extended Data Fig 8f**). Nsp3  
236 expression depleted Lys48-linked polyubiquitin, which was inhibited by rac5c in a  
237 dose dependent manner (**Figure 4d, Extended Data Fig 8f**). Since it had previously  
238 been shown that these inhibitors are specific for PLpro over human DUBs<sup>1</sup> (also see  
239 **Figure 3b**) and since treatment with rac5c did not affect Lys48-linked polyubiquitin in  
240 the absence of nsp3 expression (**Extended Data Fig 8f**), the effect of rac5c on  
241 Lys48-polyubiquitin is likely due to inhibition of nsp3/PLpro.

242

### 243 **Antiviral efficacy of SARS2 PLpro inhibitors**

244 All three compounds were tested for their inhibitory potential in Vero monkey kidney  
245 epithelial cells infected with SARS-CoV-2. Vero cells undergo extensive cell death  
246 upon SARS-CoV-2 infection in contrast to many human cell lines where cytopathic  
247 effect (CPE) is less evident<sup>33</sup>. In addition, we found Vero cells were sensitive to  
248 DMSO concentrations above 0.3% (v/v), limiting the useful range at which inhibitors  
249 could be applied due to their low solubility (**Extended Data Fig. 9a**). Synthesised  
250 compounds rac3j, rac3k and rac5e showed no toxicity on Vero cells when used in  
251 0.1% DMSO (enabling compound assessment on cells at concentrations up to 11  
252  $\mu\text{M}$ ), but toxicity increased with higher compound and DMSO concentrations (33  $\mu\text{M}$   
253 compound, in 0.3% DMSO) (**Extended Data Fig. 9b**).

254 Next, compounds were tested in Vero cells infected with SARS-CoV-2 at a  
255 multiplicity-of-infection (MOI) of 0.1 (**Figure 5a**), resulting in death of ~50% of the cell  
256 population. Remdesivir (RDV)<sup>34,35</sup>, the only available drug approved for treatment of  
257 COVID-19, was used at 12.5  $\mu\text{M}$  concentration<sup>36</sup>, leading to a ~90% reversal of the  
258 SARS-CoV-2 induced CPE. Hydroxychloroquine (HCQ), at 10  $\mu\text{M}$ <sup>37</sup>, rescued CPE  
259 also by ~90% (**Figure 5b, Extended Data Fig. 9c,d**).

260

261 High (33  $\mu\text{M}$ ) concentrations of rac5c, rac3j or rac3k, rescued cells from SARS-CoV-  
262 2 induced CPE compensating for, and despite, the background toxicity associated  
263 with high DMSO concentrations described above (**Figure 5b, Extended Data Fig.**  
264 **9c,d**). For rac3j and rac3k, this effect diminished at lower concentrations (**Extended**  
265 **Data Fig 9c,d**). For rac5c, treatment at non-cytotoxic concentrations of 11  $\mu\text{M}$

266 continued to show a marked reduction on CPE, indicating clear antiviral activity  
267 **(Figure 5b).**

268 Antiviral activity is best assessed by a compound's effect on TCID<sub>50</sub> (mean tissue  
269 culture infection dose) in which cell supernatant from infected cells is assessed for  
270 infectious viral titre in secondary infections. RDV (12.5  $\mu$ M) and HCQ (10  $\mu$ M)  
271 reduced viral titre by 100- and 10-fold, respectively. SARS2 PLpro inhibitors, at  
272 concentrations that protected cells from CPE, showed a 3-4 log decrease in  
273 infectious viral titre at 33  $\mu$ M **(Figure 5c, Extended Data Fig. 9e,f)**, and rac5c at 11  
274  $\mu$ M decreased viral titre to a similar extent as RDV and HCQ treatment. In a  
275 second model system, the human lung adenocarcinoma cell line Calu-3, infection  
276 with SARS-CoV-2 decreased Lys48-polyubiquitin levels, which could be rescued  
277 with rac5c treatment **(Extended Data Fig. 9g, h)**. Together, our data highlight that  
278 inhibition of SARS2 PLpro with small molecules can have striking antiviral effects.

279

## 280 **Conclusion**

281 The biochemical activities and structural properties of the PLpro domain of the  
282 essential SARS-CoV-2 protein nsp3 hold tremendous promise as a target to  
283 generate a new class of antivirals for coronaviruses. The three distinct substrates of  
284 PLpro, namely the viral polyprotein, degradative Lys48-polyubiquitin and antiviral  
285 ISG15 signals, make PLpro an excellent candidate for pharmacological intervention.  
286 Detailed molecular understanding of how PLpro targets ubiquitin and ISG15, and a  
287 robust high-throughput screen, pave the way to structure-guided drug discovery.  
288 Indeed, while available clinically tested drugs may not be suitable to target PLpro  
289 **(Figure 3)**, exciting pharmacologically unrefined lead compounds are already  
290 available to specifically target SARS2 PLpro. We show that these compounds have  
291 antiviral efficacy and seem as potent as other drugs that target viral replication (e.g.  
292 the viral polymerase inhibitor Remdesivir). Moreover, the direct antiviral effect of  
293 PLpro inhibitors is likely further supplemented by suppressing PLpro's role in  
294 subverting the innate immune system. PLpro inhibitors may prove useful in restarting  
295 (and/or rebalancing) host processes pathologically deregulated in COVID-19.

296 **Acknowledgments**

297 We would like to thank Kanta Subbarao (Peter Doherty Institute, Melbourne) for live  
298 SARS-CoV-2 virus, Frederick P. (Fritz) Roth (University of Toronto) for providing the  
299 SARS2 nsp3 pENTRY plasmid, Thibault Major (University of British Columbia,  
300 Vancouver) for vectors and for supporting J. Bernardini, Sandra Nicholson, Peter  
301 Colman, Ian Wicks and Thomas Cotton (WEHI) for sharing expertise and reagents,  
302 and Jonathan O'Connell (FORMA Therapeutics) for advice on high-throughput  
303 assays.

304  
305 This work was funded by The Walter and Eliza Hall Institute of Medical Research, an  
306 NHMRC/MRFF 'VirDUB' grant MRF2002119 (to DK, GL, MP, PEC), NHMRC  
307 Investigator Grants and Fellowships (GNT1178122 to DK, GNT0637350 to MP, and  
308 GNT1117089 to GL), NHMRC Independent Research Institutes Infrastructure  
309 Support Scheme grant (361646) and Victorian State Government Operational  
310 Infrastructure Support grant, and a generous donation by Hengyi Pacific Pty Ltd to  
311 support COVID-19 research.

312  
313 Screening was conducted at the Walter and Eliza Hall Institute's National Drug  
314 Discovery Centre (NDDC). The NDDC received grant funding from the Australian  
315 Government and the Victorian State Government, with additional support from  
316 generous philanthropic donors including Mike Fitzpatrick, Helen Sykes and AWM  
317 Electrical. WEHI's screening facilities are also supported by Therapeutic Innovation  
318 Australia (TIA). TIA is supported by the Australian Government through the National  
319 Collaborative Research Infrastructure Strategy (NCRIS) program. The Australian  
320 Drug Discovery Library (ADDL) was compiled with the financial assistance of  
321 MTPConnect. We acknowledge Compounds Australia  
322 ([www.compoundsaustralia.com](http://www.compoundsaustralia.com)) for their provision of specialised compound  
323 management and logistics services to the project. This research was undertaken in  
324 part using the MX2 beamline at the Australian Synchrotron, part of ANSTO, and  
325 made use of the Australian Cancer Research Foundation (ACRF) detector.

326  
327 **Author contributions**

328 DK, GL, MP and PEC conceived the project and obtained funding. TK produced pure  
329 PLpro, performed FP assays, crystallised PLpro bound to ubiquitin, and determined



330 structures. Protein production, gel-based activity assays, and probe generation was  
331 performed by DJC and LWR. YS and ZYG generated and purified mutant PLpro.  
332 PPG and HO contributed ISG15<sup>CTD</sup>-TAMRA reagent. DJC crystallised the  
333 PLpro~ISG15<sup>CTD</sup> complex with help from LWR. JN set up protein crystallisation and  
334 guided crystal optimisation. TK, BCL and DK collected synchrotron data with support  
335 from AR-T and PEC, and TK and BCL refined structures. NWK, JPM, CG, and GL  
336 designed and performed compound synthesis. BGCL and KNL designed and  
337 established high throughput assays, and BGCL, AEA, TRB, JPM and KNL performed  
338 high throughput screens and analysed data. JPB, GD, RF designed and performed  
339 nsp3 and PLpro expression studies in cells. GE, CCA, JPC, MD and MP designed  
340 and established SARS-CoV-2 infection models and analysed data. DK wrote the  
341 manuscript with help from all authors.

342

### 343 **Author information**

344 The authors declare no competing interests. All reagents and materials are available  
345 upon reasonable request from the corresponding author ([dk@wehi.edu.au](mailto:dk@wehi.edu.au)).

346

### 347 **References**

- 348 1. Baez-Santos, Y. M., St John, S. E. & Mesecar, A. D. The SARS-coronavirus  
349 papain-like protease: structure, function and inhibition by designed antiviral  
350 compounds. *Antiviral Res.* **115**, 21–38 (2015).
- 351 2. Bailey-Elkin, B. A., Knaap, R. C. M., Kikkert, M. & Mark, B. L. Structure and  
352 Function of Viral Deubiquitinating Enzymes. *J Mol Biol* **429**, 3441–3470 (2017).
- 353 3. Ghosh, A. K., Brindisi, M., Shahabi, D., Chapman, M. E. & Mesecar, A. D.  
354 Drug Development and Medicinal Chemistry Efforts toward SARS-Coronavirus  
355 and Covid-19 Therapeutics. *ChemMedChem* **15**, 907–932 (2020).
- 356 4. Kim, J. C., Spence, R. A., Currier, P. F., Lu, X. & Denison, M. R. Coronavirus  
357 protein processing and RNA synthesis is inhibited by the cysteine proteinase  
358 inhibitor E64d. *Virology* **208**, 1–8 (1995).
- 359 5. Barretto, N. *et al.* The papain-like protease of severe acute respiratory  
360 syndrome coronavirus has deubiquitinating activity. *J Virol* **79**, 15189–15198  
361 (2005).
- 362 6. Ivashkiv, L. B. & Donlin, L. T. Regulation of type I interferon responses. *Nat*  
363 *Rev Immunol* **14**, 36–49 (2014).
- 364 7. Berlin, D. A., Gulick, R. M. & Martinez, F. J. Severe Covid-19. *N. Engl. J. Med.*  
365 NEJMcp2009575 (2020). doi:10.1056/NEJMcp2009575
- 366 8. Isaacson, M. K. & Ploegh, H. L. Ubiquitination, ubiquitin-like modifiers, and  
367 deubiquitination in viral infection. *Cell Host Microbe* **5**, 559–570 (2009).
- 368 9. Heaton, S. M., Borg, N. A. & Dixit, V. M. Ubiquitin in the activation and  
369 attenuation of innate antiviral immunity. *J Exp Med* **213**, 1–13 (2016).

- 370 10. Yau, R. & Rape, M. The increasing complexity of the ubiquitin code. *Nature*  
371 *Cell Biology* **18**, 579–586 (2016).
- 372 11. Swatek, K. N. & Komander, D. Ubiquitin modifications. *Cell Res* **26**, 399–422  
373 (2016).
- 374 12. Ebner, P., Versteeg, G. A. & Ikeda, F. Ubiquitin enzymes in the regulation of  
375 immune responses. *Crit. Rev. Biochem. Mol. Biol.* **52**, 425–460 (2017).
- 376 13. Perng, Y.-C. & Lenschow, D. J. ISG15 in antiviral immunity and beyond. *Nat*  
377 *Rev Microbiol* **16**, 423–439 (2018).
- 378 14. Dzimianski, J. V., Scholte, F. E. M., Bergeron, É. & Pegan, S. D. ISG15: It's  
379 Complicated. *J Mol Biol* **431**, 4203–4216 (2019).
- 380 15. Harcourt, B. H. *et al.* Identification of severe acute respiratory syndrome  
381 coronavirus replicase products and characterization of papain-like protease  
382 activity. *J Virol* **78**, 13600–13612 (2004).
- 383 16. Clementz, M. A. *et al.* Deubiquitinating and interferon antagonism activities of  
384 coronavirus papain-like proteases. *J Virol* **84**, 4619–4629 (2010).
- 385 17. Békés, M. *et al.* SARS hCoV papain-like protease is a unique Lys48 linkage-  
386 specific di-distributive deubiquitinating enzyme. *Biochem J* **468**, 215–226  
387 (2015).
- 388 18. Lindner, H. A. *et al.* Selectivity in ISG15 and ubiquitin recognition by the SARS  
389 coronavirus papain-like protease. *Arch Biochem Biophys* **466**, 8–14 (2007).
- 390 19. Lindner, H. A. *et al.* The papain-like protease from the severe acute respiratory  
391 syndrome coronavirus is a deubiquitinating enzyme. *J Virol* **79**, 15199–15208  
392 (2005).
- 393 20. Békés, M. *et al.* Recognition of Lys48-Linked Di-ubiquitin and Deubiquitinating  
394 Activities of the SARS Coronavirus Papain-like Protease. *Mol Cell* **62**, 572–585  
395 (2016).
- 396 21. Mevissen, T. E. T. & Komander, D. Mechanisms of Deubiquitinase Specificity  
397 and Regulation. *Annu Rev Biochem* **86**, 159–192 (2017).
- 398 22. Swatek, K. N. *et al.* Irreversible inactivation of ISG15 by a viral leader protease  
399 enables alternative infection detection strategies. *Proceedings of the National*  
400 *Academy of Sciences* **115**, 2371–2376 (2018).
- 401 23. Chou, C.-Y. *et al.* Structural basis for catalysis and ubiquitin recognition by the  
402 severe acute respiratory syndrome coronavirus papain-like protease. *Acta*  
403 *Crystallogr. D Biol. Crystallogr.* **70**, 572–581 (2014).
- 404 24. Ratia, K., Kilianski, A., Baez-Santos, Y. M., Baker, S. C. & Mesecar, A.  
405 Structural Basis for the Ubiquitin-Linkage Specificity and deISGylating activity  
406 of SARS-CoV papain-like protease. *PLoS Pathog.* **10**, e1004113 (2014).
- 407 25. Daczkowski, C. M. *et al.* Structural Insights into the Interaction of Coronavirus  
408 Papain-Like Proteases and Interferon-Stimulated Gene Product 15 from  
409 Different Species. *J Mol Biol* **429**, 1661–1683 (2017).
- 410 26. Bailey-Elkin, B. A. *et al.* Crystal structure of the Middle East respiratory  
411 syndrome coronavirus (MERS-CoV) papain-like protease bound to ubiquitin  
412 facilitates targeted disruption of deubiquitinating activity to demonstrate its role  
413 in innate immune suppression. *J Biol Chem* **289**, 34667–34682 (2014).
- 414 27. Clasman, J. R., Everett, R. K., Srinivasan, K. & Mesecar, A. D. Decoupling  
415 deISGylating and deubiquitinating activities of the MERS virus papain-like  
416 protease. *Antiviral Res.* **174**, 104661 (2020).
- 417 28. Turnbull, A. P. *et al.* Molecular basis of USP7 inhibition by selective small-  
418 molecule inhibitors. *Nature* **550**, 481–486 (2017).

- 419 29. Baez-Santos, Y. M. *et al.* X-ray structural and biological evaluation of a series  
420 of potent and highly selective inhibitors of human coronavirus papain-like  
421 proteases. *J. Med. Chem.* **57**, 2393–2412 (2014).
- 422 30. Ye, Y. *et al.* Polyubiquitin binding and cross-reactivity in the USP domain  
423 deubiquitinase USP21. *EMBO Rep* **12**, 350–357 (2011).
- 424 31. Ratia, K. *et al.* A noncovalent class of papain-like protease/deubiquitinase  
425 inhibitors blocks SARS virus replication. *Proceedings of the National Academy  
426 of Sciences* **105**, 16119–16124 (2008).
- 427 32. Lee, H. *et al.* Inhibitor recognition specificity of MERS-CoV papain-like  
428 protease may differ from that of SARS-CoV. *ACS Chem. Biol.* **10**, 1456–1465  
429 (2015).
- 430 33. Chu, H., Chan, J., Yuen, T. & Shuai, H. Comparative tropism, replication  
431 kinetics, and cell damage profiling of SARS-CoV-2 and SARS-CoV with  
432 implications for clinical manifestations .... *Lancet Microbe* **1**, e14–23 (2020).
- 433 34. Pruijssers, A. J. *et al.* Remdesivir potently inhibits SARS-CoV-2 in human lung  
434 cells and chimeric SARS-CoV expressing the SARS-CoV-2 RNA polymerase  
435 in mice. *bioRxiv* **8**, 2020.04.27.064279 (2020).
- 436 35. Wang, M. *et al.* Remdesivir and chloroquine effectively inhibit the recently  
437 emerged novel coronavirus (2019-nCoV) in vitro. *Cell Res* **30**, 269–271 (2020).
- 438 36. Choy, K.-T. *et al.* Remdesivir, lopinavir, emetine, and homoharringtonine inhibit  
439 SARS-CoV-2 replication in vitro. *Antiviral Res.* **178**, 104786 (2020).
- 440 37. Yao, X. *et al.* In Vitro Antiviral Activity and Projection of Optimized Dosing  
441 Design of Hydroxychloroquine for the Treatment of Severe Acute Respiratory  
442 Syndrome Coronavirus 2 (SARS-CoV-2). *Clin. Infect. Dis.* (2020).  
443 doi:10.1093/cid/ciaa237  
444

#### 445 **Methods and Extended Data References**

- 446 38. Berrow, N. S. *et al.* A versatile ligation-independent cloning method suitable for  
447 high-throughput expression screening applications. *Nucleic Acids Res* **35**, e45  
448 (2007).
- 449 39. Gersch, M. *et al.* Mechanism and regulation of the Lys6-selective  
450 deubiquitinase USP30. *Nat Struct Mol Biol* **510**, 370–930 (2017).
- 451 40. Wilkinson, K. D., Gan-Erdene, T. & Kolli, N. Derivatization of the C-terminus of  
452 ubiquitin and ubiquitin-like proteins using intein chemistry: methods and uses.  
453 *Meth Enzymol* **399**, 37–51 (2005).
- 454 41. Ekkebus, R. *et al.* On terminal alkynes that can react with active-site cysteine  
455 nucleophiles in proteases. *J Am Chem Soc* **135**, 2867–2870 (2013).
- 456 42. Geurink, P. P. *et al.* Profiling DUBs and Ubl-specific proteases with activity-  
457 based probes. *Meth Enzymol* **618**, 357–387 (2019).
- 458 43. Aragão, D. *et al.* MX2: a high-flux undulator microfocus beamline serving both  
459 the chemical and macromolecular crystallography communities at the  
460 Australian Synchrotron. *Journal of synchrotron radiation* **25**, 885–891 (2018).
- 461 44. Kabsch, W. *XDS*. **66**, 125–132 (2010).
- 462 45. Evans, P. R. & Murshudov, G. N. How good are my data and what is the  
463 resolution? **69**, 1204–1214 (2013).
- 464 46. Winn, M. D. *et al.* Overview of the CCP4 suite and current developments. **67**,  
465 235–242 (2011).
- 466 47. McCoy, A. J. *et al.* Phaser crystallographic software. *J Appl Crystallogr* **40**,  
467 658–674 (2007).

- 468 48. Adams, P. D. *et al.* The Phenix software for automated determination of  
469 macromolecular structures. *Methods* **55**, 94–106 (2011).
- 470 49. Emsley, P., Lohkamp, B., Scott, W. G. & Cowtan, K. Features and  
471 development of Coot. **66**, 486–501 (2010).
- 472 50. Williams, C. J. *et al.* MolProbity: More and better reference data for improved  
473 all-atom structure validation. *Protein Sci* **27**, 293–315 (2018).
- 474 51. Mevissen, T. E. T. *et al.* OTU Deubiquitinases Reveal Mechanisms of Linkage  
475 Specificity and Enable Ubiquitin Chain Restriction Analysis. *Cell* **154**, 169–184  
476 (2013).
- 477 52. Michel, M. A., Komander, D. & Elliott, P. R. Enzymatic Assembly of Ubiquitin  
478 Chains. *Methods Mol Biol* **1844**, 73–84 (2018).
- 479 53. Caly, L. *et al.* Isolation and rapid sharing of the 2019 novel coronavirus (SARS-  
480 CoV-2) from the first patient diagnosed with COVID-19 in Australia. *Med. J.*  
481 *Aust.* **212**, 459–462 (2020).
- 482 54. Magis, C. *et al.* T-Coffee: Tree-based consistency objective function for  
483 alignment evaluation. *Methods Mol Biol* **1079**, 117–129 (2014).
- 484 55. Gouet, P., Robert, X. & Courcelle, E. ESPript/ENDscript: Extracting and  
485 rendering sequence and 3D information from atomic structures of proteins.  
486 *Nucleic Acids Res* **31**, 3320–3323 (2003).
- 487 56. Ratia, K. *et al.* Severe acute respiratory syndrome coronavirus papain-like  
488 protease: structure of a viral deubiquitinating enzyme. *Proc Natl Acad Sci USA*  
489 **103**, 5717–5722 (2006).
- 490 57. Daczkowski, C. M., Goodwin, O. Y., Dzimianski, J. V., Farhat, J. J. & Pegan,  
491 S. D. Structurally Guided Removal of DeISGylase Biochemical Activity from  
492 Papain-Like Protease Originating from Middle East Respiratory Syndrome  
493 Coronavirus. *J Virol* **91**, 1814 (2017).
- 494 58. Souers, A. J. *et al.* ABT-199, a potent and selective BCL-2 inhibitor, achieves  
495 antitumor activity while sparing platelets. *Nat Med* **19**, 202–208 (2013).
- 496 59. Kotschy, A. *et al.* The MCL1 inhibitor S63845 is tolerable and effective in  
497 diverse cancer models. *Nature* **538**, 477–482 (2016).
- 498



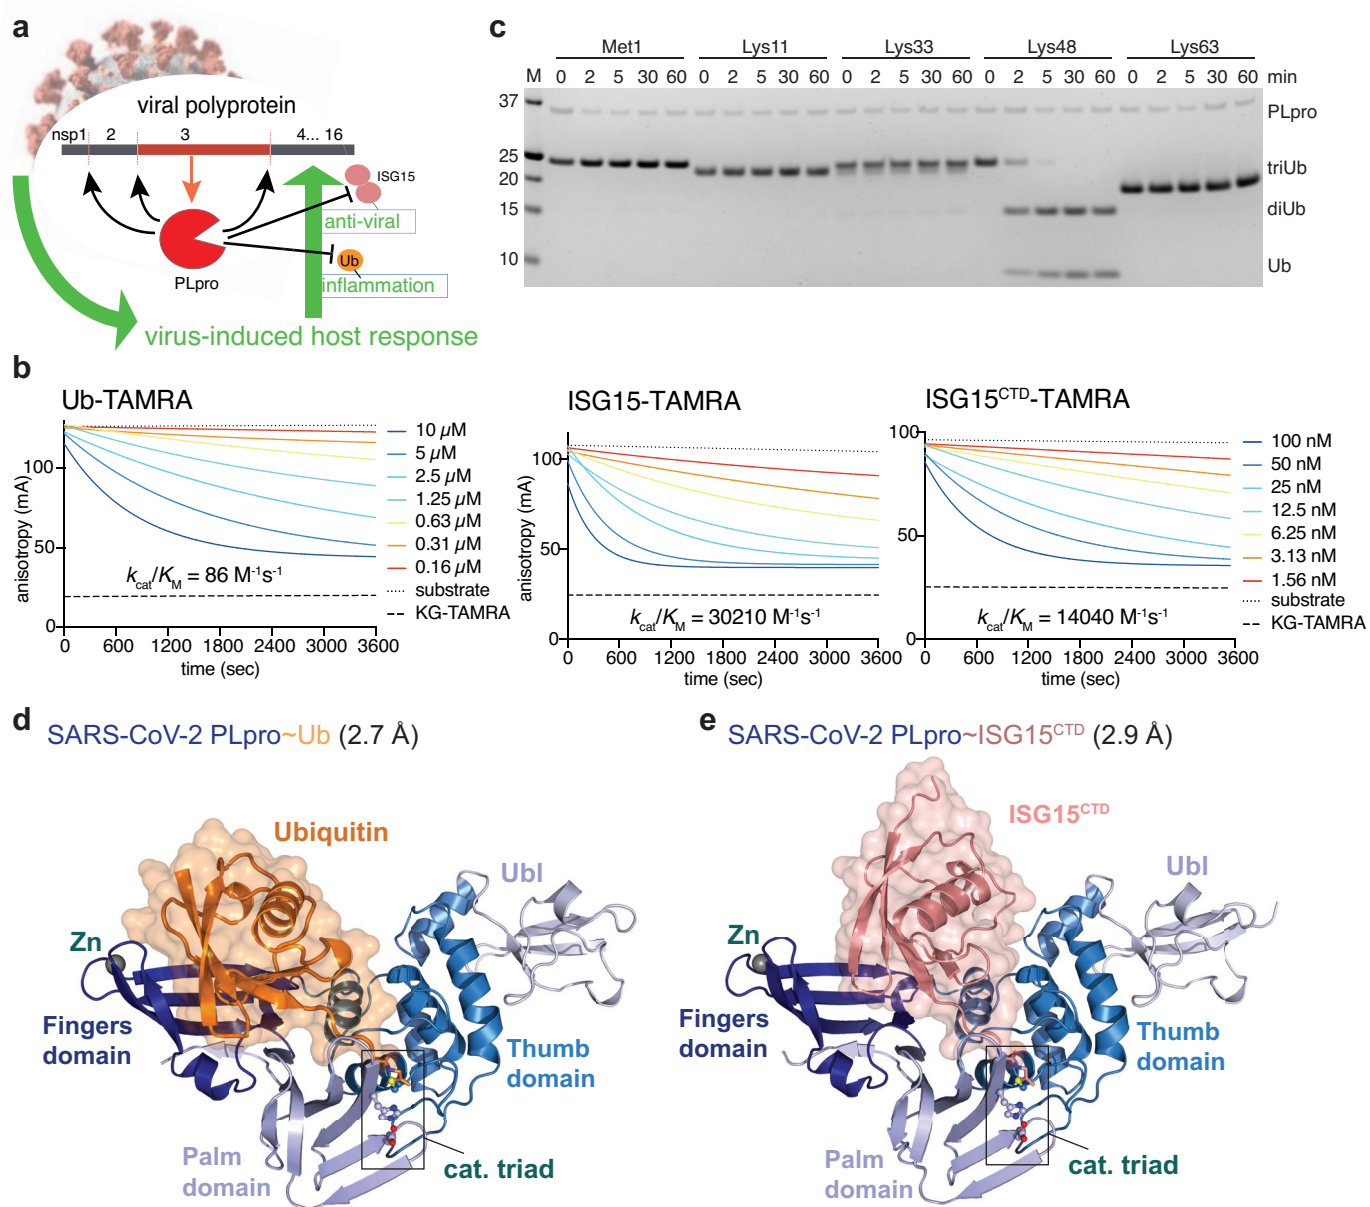

499 **Figure 1. Biophysical and structural characterisation of PLpro activity**  
500 **a**, Cartoon of Coronavirus PLpro activities. PLpro is encoded as one of various  
501 domains of the 1900 amino-acid non-structural protein nsp3, and is thought to have  
502 three functions: (i) cleaving the viral polyprotein to generate mature nsp1, nsp2 and  
503 nsp3; (ii) hydrolysing ubiquitin chains important for inflammatory responses, and (iii)  
504 removing interferon-stimulated gene 15 (ISG15) modifications from proteins,  
505 reversing antiviral responses. **b**, Fluorescence polarisation (FP) assay at indicated  
506 PLpro concentrations to derive catalytic efficiency. Experiments were performed in  
507 technical triplicate and n=5 (Ub-TAMRA), n= 6 (ISG15-TAMRA), n=4 (ISG15<sup>CTD</sup>-  
508 TAMRA) biological replicates with one biological replicate shown as representative.  
509 Catalytic efficiencies were calculated as described in **Methods**. Also see **Extended**  
510 **Data Fig. 2. c**, Time course analysis of triubiquitin (2  $\mu$ M) hydrolysis using 250 nM  
511 SARS2 PLpro, resolved on a Coomassie stained SDS-PAGE gel. Linkage specific  
512 cleavage of Lys48-linked triubiquitin to di- and monoubiquitin resembles SARS  
513 PLpro activity<sup>17,20</sup>. See **Supplementary Figure 1** for uncropped gels, and **Extended**  
514 **Data Fig. 2b-d** for gel-based cleavage quantification. **d**, Crystal structure at 2.7 Å  
515 resolution of SARS2 PLpro with subdomains coloured in shades of blue, bound to  
516 ubiquitin propargylamine (Ub-PA, orange). Catalytic triad residues are shown in ball-  
517 and-stick representation, and a Zn ion is indicated as a grey sphere. Also see  
518 **Extended Data Fig. 3** and **Extended Data Table 1. e**, Crystal structure at 2.9 Å  
519 resolution of SARS2 PLpro (blue) bound to ISG15 C-terminal domain  
520 propargylamide (ISG<sup>CTD</sup>-PA, salmon). Also see **Extended Data Fig. 3** and  
521 **Extended Data Table 1.**

522

523



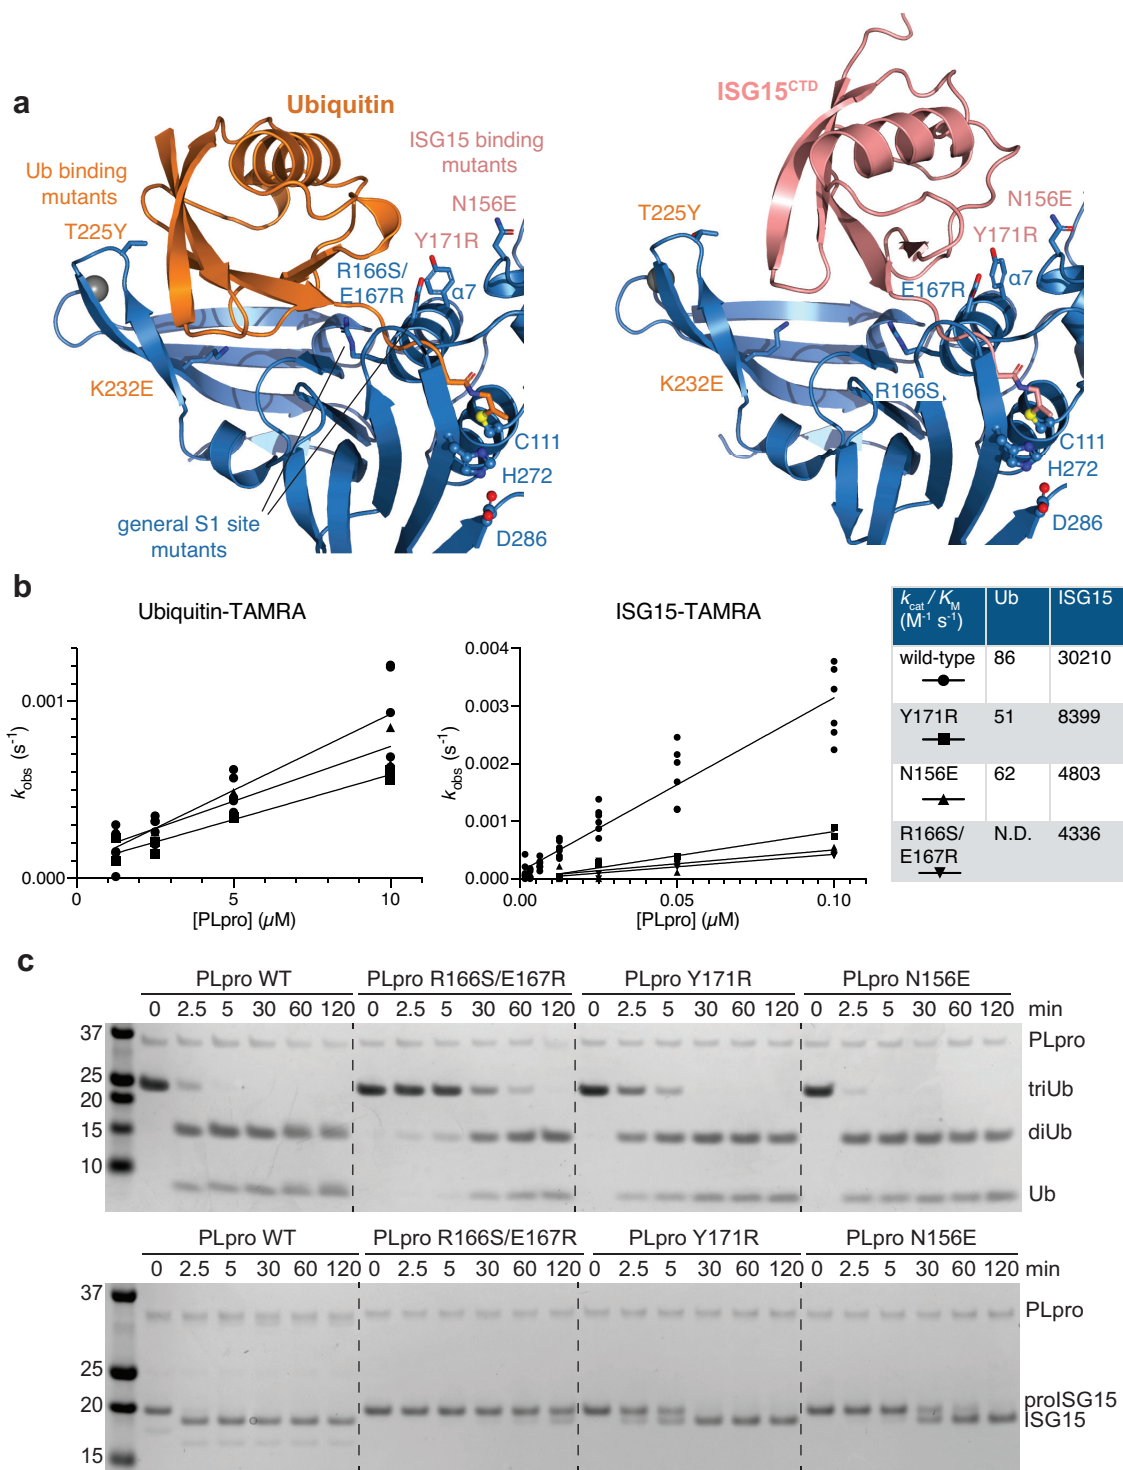

524 **Figure 2. Distinct binding of ubiquitin and ISG15 enables separation of PLpro**  
525 **function**

526 **a**, Detail of the S1 ubiquitin binding site of SARS2 PLpro, bound to ubiquitin (*left*) and  
527 ISG15 (*right*), highlighting differential interactions of ubiquitin with the Fingers  
528 subdomain, and of ISG15 with the Thumb subdomain of PLpro. Labelled residues  
529 were mutated, see **Extended Data Fig. 5**. **b**, Fluorescence polarisation assays  
530 against ubiquitin-TAMRA and ISG15-TAMRA using indicated SARS2 PLpro variants  
531 performed in technical triplicate and n=2 for each mutant, and compared to wild-type  
532 PLpro as shown in **Extended Data Fig. 2a**. Catalytic efficiencies were calculated as  
533 described in **Methods**. **c**, Gel based analysis of PLpro variant activity against Lys48-  
534 triubiquitin and proISG15. Experiments were performed in duplicate, see **Extended**  
535 **Data Fig. 5** and **Supplementary Figure 1**.

536

537

**a**

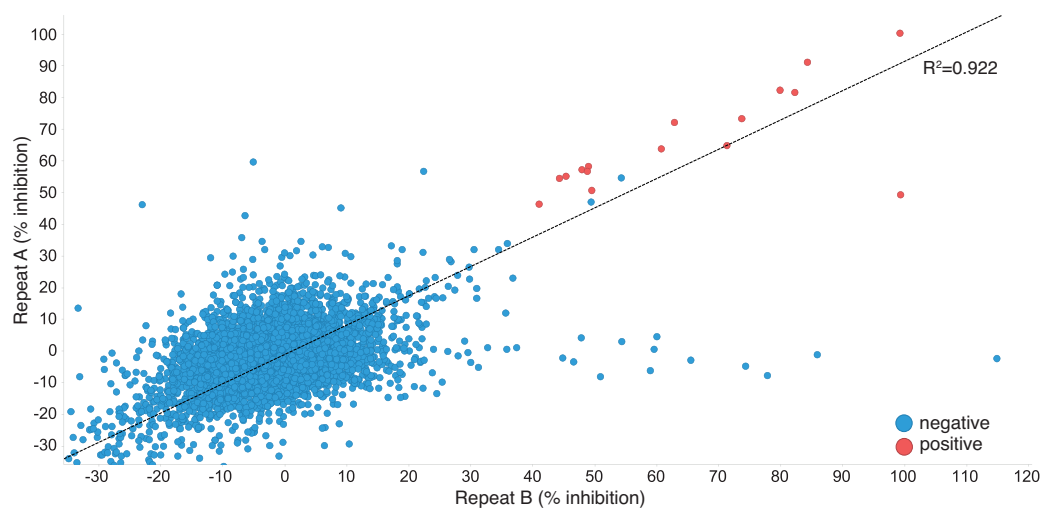

**b**

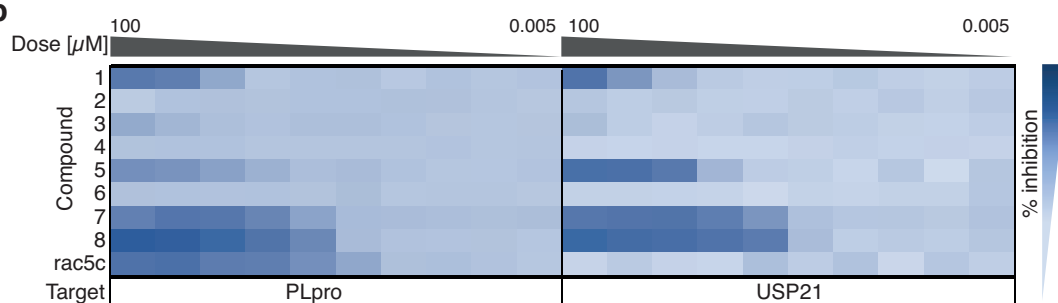

538 **Figure 3. High throughput screen of SARS2 PLpro against known drugs**

539 **a**, High throughput screening of SARS2 PLpro was performed against 5576  
540 approved drugs and late-stage clinical compounds, in 1536-well format using Ub-  
541 Rhodamine (see **Methods**). Two replicates out of three are shown; hit compounds  
542 were those that inhibited PLpro activity by more than 40% in all three replicates.  
543 Correlation ( $R^2$ ) between all screens exceeded 0.89. See **Extended Data Fig. 7** for  
544 assay design and quality control, and **Methods**. **b**, Hit compounds and compound  
545 rac5c (see **Figure 4**), were further assessed in 10-point  $IC_{50}$  titrations using the Ub-  
546 Rhodamine assay, using a starting concentration of 100  $\mu$ M serially diluted in 1:3  
547 steps. Degree of inhibition is shown as a titration heat-map from dark (full inhibition)  
548 to light blue (low/no inhibition). The catalytic domain of human USP21<sup>30</sup> was used as  
549 a counterscreen. Each PLpro hit compound showed either no activity in the titration  
550 analysis, or an identical inhibition profile against PLpro and USP21, suggesting  
551 assay interference. Rac5c was specific for SARS2 PLpro and did not inhibit USP21  
552 even at the highest concentration of 100  $\mu$ M.  $IC_{50}$  assays were performed in  
553 technical triplicate in two independent experiments.

554

555

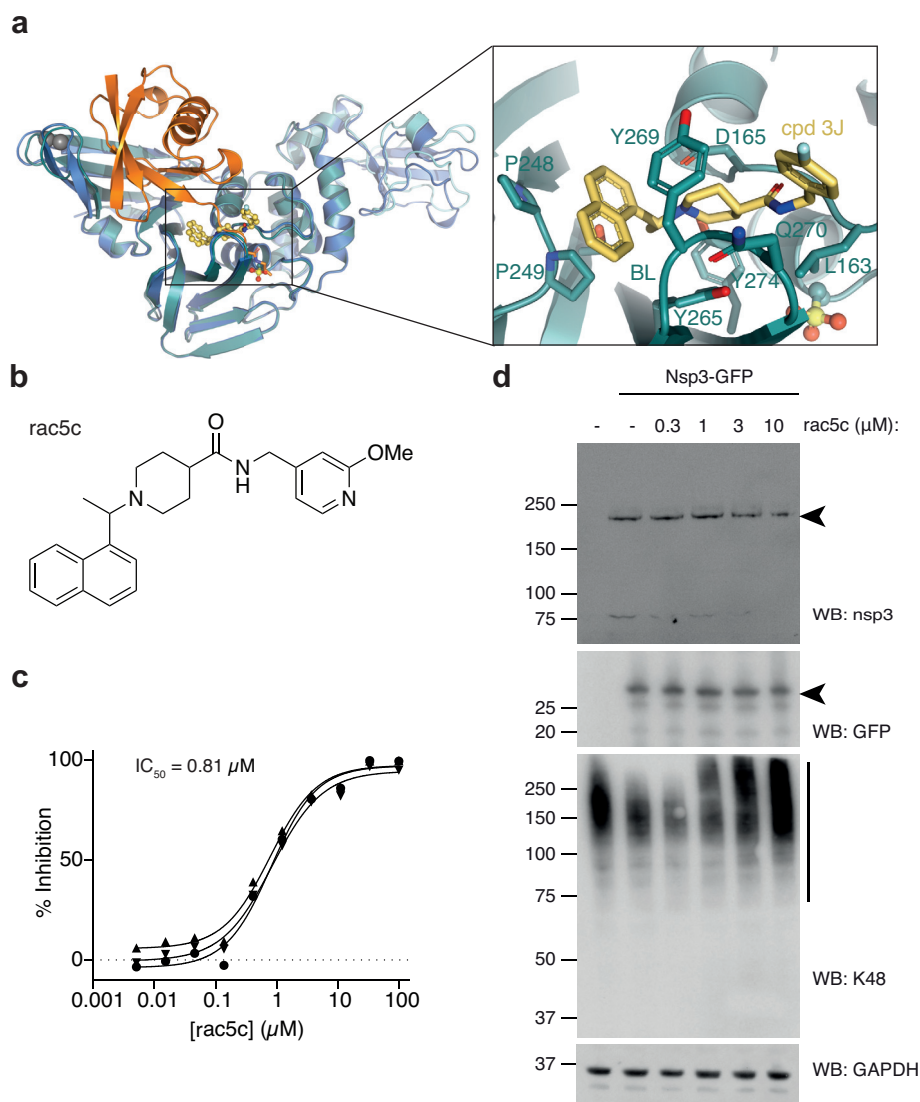

556 **Figure 4. SARS PLpro inhibitors target SARS2 PLpro**

557 **a**, Structure of SARS PLpro bound to compound 3j (cyan/yellow, pdb 4ovz, <sup>29</sup>)  
558 superposed with SARS2 PLpro~Ub (blue/orange). The inset shows compound 3j  
559 bound near the active site. See **Extended Data Fig. 8a,b** for further details. **b**,  
560 Chemical structure of rac5c. See **Supplementary Chemistry Methods. c**, *In vitro*  
561 inhibition (IC<sub>50</sub>) for rac5c inhibiting SARS2 PLpro. Experiments were performed  
562 using the HTS assay (**Figure 3**), in technical triplicate in three independent  
563 experiments. A geometric mean was used to determine IC<sub>50</sub>. **d**, Full-length nsp3 was  
564 expressed from a C-terminally GFP-tagged vector in HEK293T cells and treated with  
565 increasing concentrations of rac5c for 9 h. GFP is released from the C-terminus,  
566 presumably by nsp3 activity. Nsp3 can be detected by a SARS2 PLpro antibody (see  
567 **Extended Data Fig. 8e** for antibody validation). Lysates were blotted for Lys48-  
568 polyubiquitin with a linkage specific antibody. Experiments were performed in  
569 duplicate with similar results. Also see **Extended Data Fig. 8f** and **Supplementary**  
570 **Figure 1** for uncropped blots.

571

572



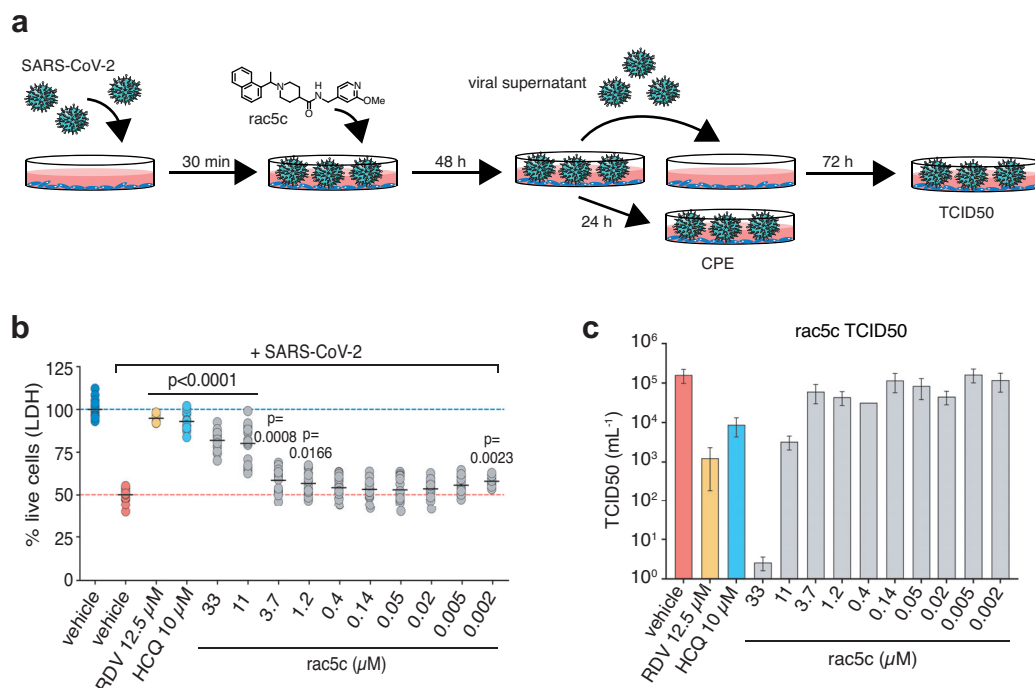

573 **Figure 5. Antiviral effects of SARS2 PLpro inhibitors in an infection model**

574 **a**, Vero cells were infected with SARS-CoV-2 and analysed as shown in the cartoon  
575 (see **Methods**). **b**, Reduction in SARS-CoV-2 induced cytopathic effect with rac5c,  
576 Remdesivir (RDV) and hydroxychloroquine (HCQ) treatment. DMSO 0.3% (v/v) was  
577 required to keep 33  $\mu$ M rac5c in solution (see **Extended Data Fig 9a,b**). Mean  
578 (black line) is provided for 18 samples in each group, representing 3 independent  
579 experiments with 6 biological replicates per experiment across the different  
580 concentrations of rac5c. HCQ data is pooled from 2 independent experiments and  
581 RDV from 1 experiment using 6 biological repeats. P values were calculated using a  
582 one-way ANOVA, with regular Dunnet's post-hoc test for multiple comparisons  
583 between treatment arms and infected/vehicle treated control using a single pooled  
584 variance. **c**, TCID50 data, mean and SD, for one representative experiment from **b**  
585 with 6 technical replicates.

586

587 **Online Methods**

588

589 **Molecular Biology**

590 ***Generation of bacterial expression vectors***

591 The sequence of SARS CoV-2 PLpro (amino acids (aa) 1563-1878, with aa E1564  
592 designated as residue 1, according to previously published numbering) was based  
593 on the polyprotein orf1ab (GeneBank: QHD43415) and was purchased as a codon-  
594 optimised gene-block (IDT) for bacterial expression. PLpro was cloned by ligation  
595 independent cloning into the pOPIN-B vector<sup>38</sup> using the In-Fusion HD cloning Kit  
596 (Takara Clontech). All PLpro mutants were introduced by site directed mutagenesis  
597 using the Q5 Site-Directed Mutagenesis Kit (NEB).

598 For Ub-PA and ISG15<sup>CTD</sup>-PA preparation, Ub (1-75) and ISG15<sup>CTD</sup> (79-156) genes  
599 were expressed from pTXB1 vectors as described<sup>22,39</sup>.

600 proISG15 (2-165) and proISG15<sup>CTD</sup> (79-165) were expressed from pOPIN-B vectors  
601 as described in<sup>22</sup>.

602

603 ***Generation of mammalian expression vectors***

604 For mammalian expression, SARS2 PLpro variants, SARS PLpro (aa 1541-1855 of  
605 polyprotein 1ab) and MERS PLpro (aa 1482-1803 of polyprotein 1ab) were  
606 generated as codon optimised gene-block (IDT) for bacterial expression, and were  
607 transferred into pOPIN-F using In-Fusion HD cloning (Takara Clontech).

608 Full length nsp3 (kindly provided by Fritz Roth, University of Toronto) was cloned  
609 from a pENTRY vector into the pDEST47 vector using gateway cloning with the LR  
610 clonase mix (Invitrogen), according to manufacturer's instructions.

611

612 **Protein purification**

613 ***PLpro***

614 PLpro wild-type and mutant expression vectors were transformed into *E. coli* Rosetta  
615 2(DE3) pLacI competent cells (Novagen) and bacterial cells were grown in 2xYT  
616 medium at 37 °C. At OD<sub>600</sub> = 0.8 the temperature was reduced to 18 °C and  
617 expression was induced with 0.3 mM IPTG. Cells were harvested 16 h post induction  
618 and stored at -20 °C.

619 For purification, cells were resuspended in lysis buffer (50 mM Tris pH 7.5, 300 mM  
620 NaCl) supplemented with lysozyme, DNaseI and cComplete EDTA-free protease  
621 inhibitor cocktail tablets (Roche) and lysed by sonication. Lysates were cleared by  
622 centrifugation at 40,000 *g* for 30 min at 4 °C and His-tagged proteins were purified  
623 either by using a HisTrap FF column (5 mL, Cytvia) with gradient elution over 5  
624 column volume (CV) from buffer A (20 mM Tris pH 7.5, 300 mM NaCl and 10 mM  
625 Imidazole) to buffer B (20 mM Tris pH 7.5, 300 mM NaCl and 400 mM Imidazole), or  
626 with Ni-NTA HisBind resin (EMD Millipore) eluting with buffer B (2x 10 mL). Pooled  
627 fractions were supplemented with His-3C protease for His-tag cleavage and dialysed  
628 overnight at 4 °C (for wt: 50 mM Tris pH 7.5, 300 mM NaCl, 5 mM β-  
629 mercaptoethanol (bME), for mutants: 20 mM HEPES pH 7.5, 300 mM NaCl and 10  
630 mM bME). His-3C protease and His tags were removed by Ni-NTA HisBind resin  
631 (EMD Millipore) and proteins were further purified by size exclusion chromatography  
632 using a HiLoad 16/600 Superdex 75 pg column (GE Healthcare) equilibrated with  
633 storage buffer (20 mM HEPES pH 7.5, 150 mM NaCl, 1 mM TCEP). Protein samples  
634 were concentrated, flash frozen in liquid nitrogen and stored at -80 °C.

635

### 636 ***Thermal shift assay***

637 Thermal shift assays were performed for quality control after PLpro wt and mutant  
638 purification, using the Tycho NT.6 (NanoTemper Technologies). PLpro wt and  
639 mutants were measured at 1 μM in storage buffer. The inflection temperatures of  
640 each protein were calculated by the Tycho NT.6 software (1.2.0.750). Technical  
641 duplicates were measured in two independent experiments. Data were analysed  
642 using GrapPad Prism.

643

### 644 ***His<sub>6</sub>-proISG15 and His<sub>6</sub>-proISG15<sup>CTD</sup> purification***

645 proISG15 and proISG15<sup>CTD</sup> were expressed as described above but induced with  
646 0.2 mM IPTG and resuspended in buffer C (50 mM Tris pH 7.5, 150 mM NaCl, 2 mM  
647 bME) prior storage at -20°C. Affinity purification was performed as for PLpro but with  
648 the following modifications. HisTrap FF resin was washed with buffer C  
649 supplemented with 15 mM imidazole and eluted with a linear gradient of 10 CV from  
650 buffer C to buffer D (buffer C supplemented with 300 mM imidazole). Eluted proteins

651 were diluted 10-fold to a low salt buffer (50 mM Tris pH 8.0, 30 mM NaCl, 2 mM  
652 bME) and passed over a ResourceQ column (Cytvia). The eluted proteins were  
653 concentrated and further purified by size exclusion chromatography (HiLoad 16/600  
654 Superdex 75pg, Cytvia) into Buffer C. Protein containing fractions were  
655 concentrated, flash frozen and stored at -80°C until further use.

656

### 657 ***Generation of ubiquitin and ISG15<sup>CTD</sup> suicide probes***

658 Ub-intein and ISG15<sup>CTD</sup>-intein proteins were expressed as for PLpro. Cell pellets  
659 were resuspended in Buffer E (20 mM HEPES, 50 mM NaOAc pH 6.5, 75 mM NaCl)  
660 and Buffer F (50 mM HEPES, 100 mM NaOAc pH 6.5) respectively.

661 Ub-MesNa (2-mercaptoethansulfonate as a sodium salt) and subsequently Ub-PA  
662 were prepared as described previously<sup>39-41</sup>. Human ISG15<sup>CTD</sup> (79-156)-MesNa  
663 (ISG15<sup>CTD</sup>-MesNa) and the ISG15<sup>CTD</sup>-PA suicide probe were prepared as described  
664 previously<sup>42</sup>.

665 The completed reactions underwent final size exclusion chromatography (HiLoad  
666 16/600 Superdex 75pg, Cytvia) into Buffer E (Ub-PA) or Buffer F (matISG15<sup>CTD</sup>-PA).  
667 The resultant fractions were concentrated, flash frozen and stored at -80°C until  
668 further use.

669

### 670 ***Preparation of the PLpro~Ub and PLpro-ISG15<sup>CTD</sup> complex for crystallisation***

671 Purified PLpro was incubated with 3x molar excess of either Ub-PA or ISG15<sup>CTD</sup>-PA  
672 at RT for 2 h. Unreacted probe was separated from the complex by size exclusion  
673 chromatography (Superdex 75 Increase 10/300 GL) into 20 mM Tris pH 7.5, 150 mM  
674 NaCl, 1mM TCEP (PLpro~Ub) or 20 mM HEPES pH 7.5, 150 mM NaCl, 1 mM TCEP  
675 (PLpro~ISG15<sup>CTD</sup>) and the eluted complexes were concentrated to 4 mg/mL for  
676 PLpro~Ub and 5 mg/mL or 8 mg/mL for PLpro~ISG<sup>CTD</sup> for crystallisation.

677

### 678 ***Crystallisation***

679 Crystallisation screening was performed at the CSIRO's Collaborative Crystallisation  
680 Centre (C3) in Melbourne, Australia. For PLpro~Ub at 4 mg/mL, one crystal grew in  
681 30% (w/v) PEG 4000, 0.2 M sodium acetate, 0.1 M Tris chloride pH 8.5, in a 96-well,  
682 sitting drop vapour diffusion plate (150 nL protein to 150 nL reservoir solution) at 20

683 °C. The crystal was cryoprotected with 20% (w/v) PEG 4000, 0.2 M sodium acetate,  
684 0.1 M Tris chloride pH 8.5 and 25% (v/v) glycerol before vitrification in liquid nitrogen.  
685 For PLpro~ISG15<sup>CTD</sup> initial crystals grew at concentrations of both 5 mg/mL and 8  
686 mg/mL complex, in several conditions containing 0.2 M lithium or ammonium sulfate,  
687 25% (w/v) PEG 3350 and bis-tris chloride pH 5.5 to 6.5, at 20 °C. The structure was  
688 solved from a crystal reproduced in a hanging drop 24-well plate using 5 mg/mL  
689 protein complex grown in 0.2 M lithium sulfate, 25% (w/v) PEG 3350 and 0.1 M bis-  
690 tris chloride pH 6.5 and a protein to reservoir ratio of 1 µL to 0.5 µL. The crystal was  
691 stepwise cryoprotected by using the mother liquor supplemented with 15% (v/v)  
692 glycerol as a first and 28% (v/v) glycerol as a second step, before vitrification in liquid  
693 nitrogen.

694

#### 695 ***Data collection, phasing and refinement***

696 Diffraction data were collected at the Australian Synchrotron (Australian Nuclear  
697 Science and Technology Organisation, ANSTO) beamline MX2<sup>43</sup> (wavelength:  
698 0.953725 Å, temperature: 100K). Collected datasets were processed and scaled with  
699 XDS<sup>44</sup> and Aimless<sup>45</sup> (within CCP4suite<sup>46</sup>). The structures of SARS2 PLpro~Ub and  
700 SARS2 PLpro~ISG15<sup>CTD</sup> were solved by molecular replacement to a resolution of  
701 2.7 and 2.9 Å respectively, using Phaser<sup>47</sup> and the apo structure of SARS2 PLpro  
702 (pdb: 6wrh, unpublished) and either ubiquitin (from pdb 5ohk,<sup>39</sup>) or ISG15<sup>CTD</sup> (from  
703 pdb 6ffa,<sup>22</sup>) as search models.

704 Refinement and model building was performed in PHENIX<sup>48</sup> and Coot<sup>49</sup>. Both  
705 structures were initially refined by cartesian stimulated annealing following rigid body  
706 refinement. For both complexes, secondary structure restraints were set and the apo  
707 structure of SARS2 PLpro (pdb 6wrh, unpublished) was used as reference model.  
708 TLS parameters were set to one TLS group per chain. For SARS2 PLpro~ISG<sup>CTD</sup>  
709 additional NCS refinement was utilised in each refinement cycle. For the covalent  
710 linkage of the propargylamide to the catalytic Cys111 of SARS2 PLpro in each  
711 structure, geometric restraints for propargylamide (AYE) derived from PHENIX elbow  
712 and a parameter file defining the linkages was used. Models were validated using  
713 MolProbity<sup>50</sup> and Coot indicating for PLpro~Ub following Ramachandran plot



714 statistics: 0.0% outliers, 2.63% allowed and 97.37% favoured and for PLpro~ISG<sup>CTD</sup>:  
715 0.0% outliers, 2.60% allowed, 97.40% favoured.

716 Structural figures were generated using PyMol. Further data collection and  
717 refinement statistics can be found in **Extended Data Table 1**.

718

## 719 **PLpro activity assays**

### 720 ***Gel-based PLpro DUB activity and chain specificity assays***

721 Gel-based cleavage assays were performed as previously described<sup>51</sup> with the  
722 following modifications. Reactions were initiated at room temperature (23°C) in a  
723 final volume of 150 µL (for the specificity assay) or 350 µL (for longer time-course  
724 assays) and 20 mM Tris pH 7.5, 100 mM NaCl, 10 mM DTT was used as the  
725 reaction buffer. Triubiquitin substrates were enzymatically assembled as previously  
726 described<sup>52</sup>. Final enzyme and substrate concentrations were 0.25 µM and 2 µM  
727 respectively. Reactions were stopped at indicated time points by mixing 20 µL of  
728 reaction with 20 µL 2x NuPAGE LDS sample buffer (Invitrogen) and analysed by  
729 SDS-PAGE (Invitrogen NuPAGE™ 4-12 % Bis-Tris) and Coomassie staining (Instant  
730 Blue, Expedeon).

731

732 For gel-based quantitative analysis, Coomassie stained gel images were converted  
733 to grayscale and band intensities were quantified using ImageLab™ (Bio-Rad).  
734 Background intensities were automatically subtracted using a base line relative to  
735 the lowest contrasting band for each gel. Values were then normalised to the PLpro  
736 band in each lane. Remaining substrate concentrations were calculated with respect  
737 to the substrate concentration at time point zero (100%). The resulting values were  
738 plotted over time and the initial values within the linear range were used to calculate  
739 the relative activity measures.

740

### 741 ***Fluorescence polarisation (FP)-based PLpro activity assays***

742 FP-assays were performed with Ub-KG-TAMRA (UbiQ bio), mouse ISG15-KG-  
743 TAMRA (UbiQ bio) and ISG15<sup>CTD</sup>-TAMRA<sup>22</sup> to determine the catalytic efficiencies  
744 for PLpro wt and mutants. For the assay small volume, non-binding, black bottom,  
745 384-well plates were used, and reactions were measured on a CLARIOstar plus

746 plate reader (BMG Labtech) using optical settings for the TAMRA fluorophore  
747 (excitation: 540 nm, emission: 590 nm). Before each measurement the instrument  
748 settings were referenced to 50 mP KG-TAMRA control at a concentration of 50 nM.  
749 All substrates were used at a final concentration of 150 nM, while the dilution series  
750 of the enzyme concentrations varied according to the substrate (10  $\mu$ M - 0.156  $\mu$ M  
751 for Ub-cleavage; 100 nM - 1.56 nM for ISG15- and ISG15<sup>CTD</sup>-cleavage; 250- 3.90 nM  
752 for ISG15<sup>CTD</sup>-cleavage to determine the catalytic efficiency). Enzyme (SARS2 PLpro  
753 wild-type and mutants) and substrates were diluted in assay buffer (20mM HEPES  
754 pH 7.5, 150mM NaCl, 1mM TCEP, 50  $\mu$ g/mL BSA) to 2x concentrations and  
755 reactions were started upon addition of 2x enzyme to 2x substrate in a final volume  
756 of 15  $\mu$ L. Kinetics were measured in technical triplicates over 60 minutes with one  
757 read per minute in at least two independent experiments with the exact number  
758 indicated in the figure legends. For the determination of the catalytic efficiency of  
759 SARS2 PLpro wild-type on ISG15<sup>CTD</sup>, two of the four independent measurements  
760 were performed in technical duplicates, due to substrate limitations.  
761 Data were analysed using the CLARIOstar software MARS, Microsoft Excel and  
762 GraphPad Prism (version 8.3.1). Measured fluorescence polarisation values were  
763 blank corrected (with a buffer only control) and converted into anisotropy (mA) using  
764 the CLARIOstar MARS software. Technical replicates were averaged and fitted by  
765 non-linear curve fitting using one-phase decay in GraphPad Prism. The determined  
766 rate constants ( $k_{obs}$ ) were then plotted over the enzyme concentrations and fitted  
767 using linear regression, to determine the catalytic efficiency  $k_{cat}/K_M$  as the slope.

768

## 769 **High throughput screening (HTS)**

### 770 ***Ub-Rhodamine PLpro activity assays for HTS***

771 For HTS screening, PLpro activity was monitored in a homogenous fluorescence  
772 intensity assay using the substrate Ub-Rhodamine110Gly (UbiQ bio, here referred to  
773 as Ub-Rhodamine). Experiments were performed in either 384-well or 1536-well  
774 black non-binding plates (Greiner 784900 and 782900 respectively) with a final  
775 reaction volume of 6  $\mu$ L. The assay buffer contained 20 mM Tris (pH 8), 1 mM  
776 TCEP, 0.03% (w/v) BSA and 0.01% (v/v) Triton-X.

777 PLpro at a final concentration of 50 nM, was added to the plates (preparation of  
778 screening plates described below) and incubated at room temperature for 10 min.  
779 Ub-Rhodamine (final concentration 100 nM) was added to start the reaction and  
780 incubated for 12 min at room temperature. For end-point assays the reaction was  
781 stopped by the addition of aqueous citric acid (1  $\mu$ L) at a final concentration of  
782 10 mM. All reagents were dispensed using the CERTUS FLEX (v2.0.1, Gyger) and  
783 Microplates were centrifuged using a Microplate Centrifuge (Agilent). The reaction  
784 was monitored by an increase in fluorescence (excitation 485 nm and emission 520  
785 nm) on a PHERAstar® (v5.41, BMG Labtech) using the FI 485 520 optic module.  
786 The HTS screen was performed with one measurement for each compound in three  
787 independent experiments.

788

789 In the counterscreen the deubiquitinating enzyme USP21 (final concentration 5 nM)  
790 was used within the same setting, but using an incubation time of 2 min after addition  
791 of UbRhodamine110, before the reaction was stopped. Counter and confirmation  
792 screen were performed with 3-6 technical replicates in two independent experiments.

793

#### 794 ***Screen preparation and data analysis***

795 We assessed the activity of 5,577 compounds contained in commercially available  
796 libraries of known drugs (Sigma-Aldrich LOPAC, Tocris and Prestwick) as well as in-  
797 house curated collections of FDA approved drugs and advanced pre-clinical  
798 compounds (for a complete compound list, see **Supplementary Information**).

799 Analysis of these libraries identified 3727 unique compounds. Compounds were  
800 obtained from Compounds Australia, where they are stored under robust  
801 environmental conditions.

802

803 Assay-ready plates were prepared by dry-spotting compounds in DMSO using an  
804 Echo® Acoustic Dispenser (LabCyte). Compounds were tested at 4.2  $\mu$ M in final 2%  
805 (v/v) DMSO. The screen was run using instruments integrated with Momentum  
806 Laboratory Automation software (v5.3.1, Thermo Fisher Scientific).

807 Data was normalised to 2% (v/v) DMSO (negative control, 0% inhibition) and 100  $\mu$ M  
808 rac5c (positive control, 100% inhibition). Screen assay quality was monitored by

809 calculation of robust Z' by the following formula where (+) denotes the positive  
810 controls (low signal), (-) denotes the negative controls (high signal) and MAD is the  
811 median absolute deviation:

812

813 
$$\text{robust } Z' = 1 - (3 * (\text{MAD}_- + \text{MAD}_+) / \text{abs}(\text{median}_- - \text{median}_+))$$

814

815 where  $\text{MAD} = 1.4826 * \text{median}(\text{abs}(x - \text{median}(x)))$

816

817 Plates were excluded from analysis if robust Z' < 0.5. Hits were selected as > 4\*MAD  
818 over the median of the negative control.

819

820 To determine the potency of the inhibitors, a series of 10-point, 1:3 serial dilutions  
821 was performed from a highest starting concentration of 100  $\mu\text{M}$ . The 10-point titration  
822 curves were fitted with a 4-parameter logistic nonlinear regression model and the  
823  $\text{IC}_{50}$  reported is the inflection point of the curve. Data were analysed in TIBCO  
824 Spotfire® 7.11.2.

825

## 826 **Chemical synthesis of rac3k, rac3j and rac5c**

827 The chemical synthesis, purification and characterisation of compounds are  
828 described in the **Supplementary Information**.

829

## 830 **Cell-based studies and infection assays**

### 831 ***Cell lines used***

832 HEK293T, Vero (CCL-81) and Calu-3 cells displayed expected cell morphologies  
833 and were sent for validation to Garvan Molecular Genetics facility (on 15 June 2020).  
834 Cell lines were screened on a monthly basis for mycoplasma contamination using  
835 the Plasmotest kit (Invivogen) as per manufacturer's instructions. All used cells were  
836 mycoplasma free.

837

### 838 ***Cell culture***

839 For infection studies, Vero (CCL-81) cells were cultured in Dulbecco's Modified  
840 Eagle Medium (DMEM + 1g/L D-Glucose, L-Glutamine and 110 mg/L Sodium

841 Pyruvate; Gibco) supplemented with 10% (v/v) heat-inactivated fetal bovine serum  
842 (FBS; Sigma-Aldrich), 100 U/mL penicillin and 100 mg/mL streptomycin at 37°C and  
843 5% CO<sub>2</sub>. Vero cells were seeded in a volume of 100 µL DMEM medium into tissue  
844 culture treated flat-bottom 96-well plates (Falcon) at a density of 1 x 10<sup>4</sup> cells/well  
845 and incubated over night before infection and/or treatment at confluency.

846

847 HEK293T cells were cultured DMEM with 10% (v/v) FBS (Gibco), penicillin  
848 (100 U/mL) and streptomycin (100 µg/mL) at 37°C with 10% CO<sub>2</sub>. Cells were seeded  
849 in 6 well or 24 well plates and transfected with pOPINF vectors encoding MERS  
850 PLpro, SARS PLpro, SARS2 CoV-2 PLpro or a pDEST47 vector encoding nsp3-GFP  
851 when cells were at 70-80% confluency with Lipofectamine 3000 (Invitrogen) as per  
852 manufacturer's instructions. 48 h post transfection, cells were harvested for  
853 immunoblotting.

854

#### 855 ***Cytotoxicity and antiviral efficacy by LDH release cell death assay***

856 Viability of uninfected and vehicle (DMSO) or Bcl2-inhibitor ABT-199 and Mcl-1  
857 inhibitor S63845 treated, or uninfected and SARS-CoV-2-infected and/or PLpro  
858 inhibitor treated Vero cells was determined using the CytoTox 96® Non-Radioactive  
859 Cytotoxicity Assay (Promega) 72 hours post infection/treatment. The percentage of  
860 living cells was calculated comparing LDH release of surviving cells in infected  
861 and/or treated cells to LDH release of non-infected or non-treated control cells.  
862 Prism 8 software (GraphPad) was used to perform statistical tests in **Figure**  
863 **5 and Extended Date Fig.9**. Groups were compared as stated in figure legends.

864

#### 865 ***SARS-CoV-2 infection and inhibitor treatment***

866 SARS-CoV-2 was obtained from The Peter Doherty Institute for Infection and  
867 Immunity (Melbourne, Australia), where the virus was isolated from a traveller from  
868 Wuhan arriving in Melbourne and admitted to hospital in early 2020. Viral material  
869 was used to inoculate Vero/hSLAM cells for culture, characterisation and rapid  
870 sharing of the isolate<sup>53</sup>.

871 Vero cells were seeded and rested overnight to confluency in flat-bottom 96-well  
872 plates and washed twice with serum free DMEM medium and infected with SARS-

873 COV-2 and MOI of 0.1 or 1 in 25  $\mu$ L of serum free medium. Cells were cultured at  
874 37°C and 5% CO<sub>2</sub> for 30 minutes. Cells were topped up with 150  $\mu$ L of serum free  
875 medium containing PLpro inhibitor compounds at various concentrations in 6  
876 replicates per concentration. Cells were monitored daily by light microscopy for  
877 morphological changes resulting from virus cytopathic effect. Viability of cells was  
878 assessed at day 3 post infection / treatment by LDH release cell death assay as  
879 described above.

880

### 881 ***Median Tissue Culture Infectious Dose (TCID50) assay***

882 Vero cell culture supernatant of SARS-CoV-2 infection / treatment assays were  
883 harvested 2 days after infection / treatment and diluted in 5x 1:7 serial dilutions in a  
884 round-bottom 96 well plate (Falcon) and 6 replicates per dilution. Vero cells were  
885 seeded and rested overnight to confluency in flat-bottom 96-well plates and washed  
886 twice with serum free DMEM medium. 25  $\mu$ L of serially diluted virus was added onto  
887 washed cells and cultured at 37°C and 5% CO<sub>2</sub> for 30 minutes before cells were  
888 topped up with 150  $\mu$ L of serum free medium. Cells were monitored at day 2 post  
889 infection / treatment by light microscopy for morphological changes resulting from  
890 virus cytopathic effect. Virus concentration where 50% of cells show CPE in  
891 comparison to untreated cells was defined as TCID50 factor.

892 The TCID50 calculation is performed using the Spearman and Kärber method, which  
893 provides the mean and standard deviation after scoring 300 wells per drug (CPE or  
894 not) across the range of dilutions.

895

### 896 ***SARS-CoV-2 RNA extraction from Calu-3 cells and quantitative real time PCR.***

897 SARS-CoV-2-infected Calu-3 cells were lysed and RNA extracted using the RNeasy  
898 96 kit (Qiagen). Total cell lysate RNA was reverse transcribed and amplified on the  
899 LightCycler 96 (Roche) using the Taqman RNA-to-Ct 1-step kit (Applied Biosystems)  
900 to detect virus using the specific SARS-CoV-2 N1 primer/probe assay (IDT). Data  
901 was analysed on LightCycler 96 software (Roche).

902

### 903 ***Immunoblotting***



904 Lysates were generated by lysis in 50 mM Tris-Cl, 150 mM NaCl, 1% (v/v) NP-40  
905 with complete protease inhibitors (Roche) and quantified by BCA assay as  
906 described. SDS-PAGE was performed with between 20 and 70 ug of protein lysate  
907 run per well. Following SDS-PAGE, gels were transferred to 0.2  $\mu$ m PVDF  
908 membranes using the Transblot Turbo system (BioRad). Membranes were blocked  
909 in 5% (w/v) milk powder in Tris buffered saline with 0.05% (v/v) Tween-20 (Sigma,  
910 TBS-T) for 1 h and then incubated overnight in primary antibody diluted in 5% (v/v)  
911 BSA in TBS-T (PLpro antibody, chicken polyclonal, 1:250, (Lifesensors, #AB-0602-  
912 0250); anti-Ubiquitin antibody Lys48-specific (Apu2), rabbit monoclonal, 1:1000,  
913 (Sigma Aldrich, #05-1307); GAPDH mouse monoclonal antibody (6C5), 1:3000,  
914 (Invitrogen, #AM4300); anti-GFP antibody chicken polyclonal, 1:1000, (Abcam,  
915 #ab13970)). Following 3 TBS-T washes, membranes were incubated with  
916 conjugated secondary antibodies in TBS-T for 1 h at room temperature (IRDye  
917 800CW goat anti-mouse IgG secondary, 1:10000 (Li-Cor, #925-32210); goat anti-  
918 chicken IgY-HRP, 1:10000 (SantaCruz, #sc-2428); rabbit IgG HRP, 1:10000, (GE  
919 Healthcare, # NA934VS)). Following an additional 3 washes in TBS-T, membranes  
920 were developed with fluorescence detection or with Clarity Western ECL  
921 chemiluminescence substrate (BioRad) as per manufacturer's instructions using the  
922 Chemidoc (BioRad).

923

#### 924 **Data availability statement**

925 Coordinates and structure factors have been deposited with the protein data bank  
926 under accession codes 6xaa, 6xa9. Uncropped versions of all gels are displayed in  
927 **Supplementary Figure 1**. All reagents and data are available upon reasonable  
928 request from the corresponding author.

929

a

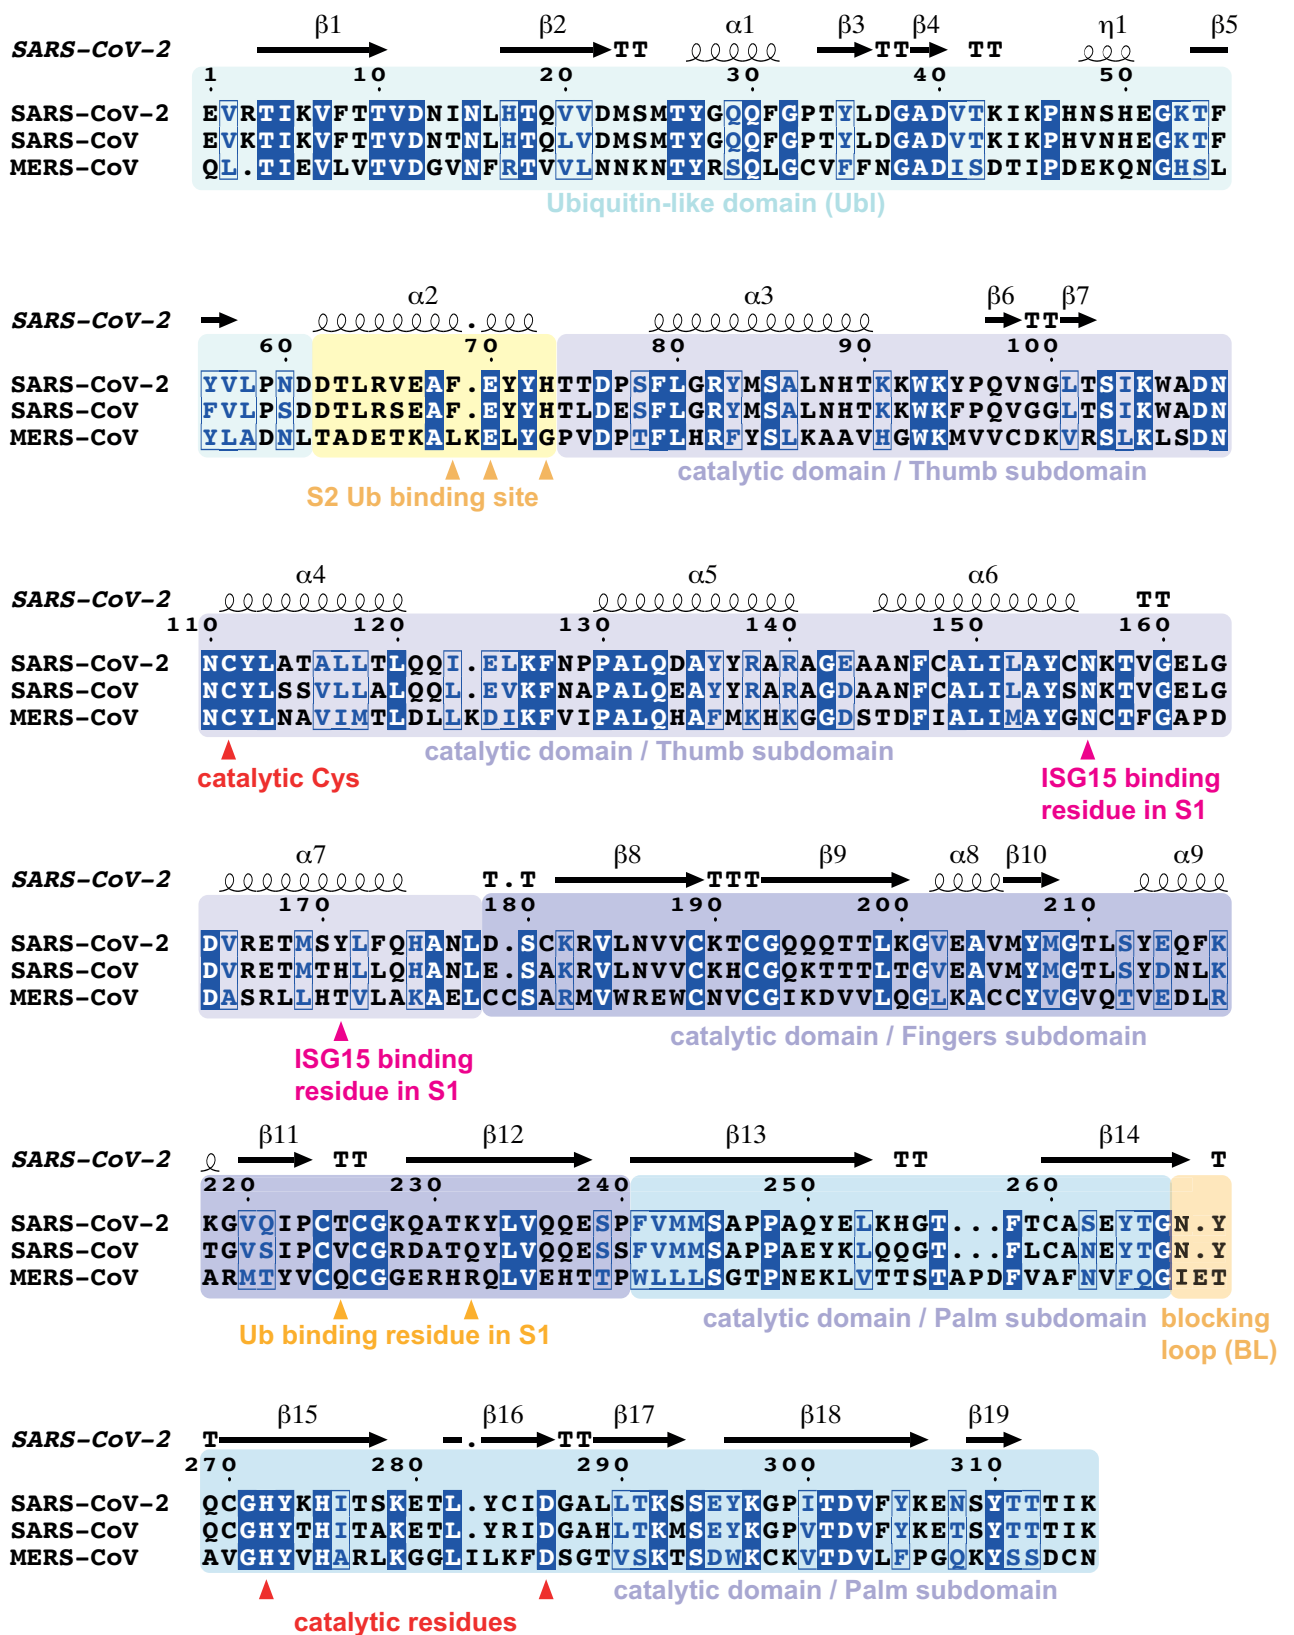

930 **Extended Data Figure 1. Annotated sequence alignment for Coronavirus PLpro**  
931 **a**, Sequence alignment generated with T-coffee/ESPRIT<sup>54,55</sup> aligning PLpro  
932 sequences from SARS2, SARS and MERS. Sequence numbering and secondary  
933 structure elements are shown according to the high-resolution apo structure of  
934 SARS-CoV-2 PLpro (pdb 6wrh, unpublished). T, turn. Domains and subdomains are  
935 boxed in different colours, and catalytic triad, as well as residues mutated in this  
936 study, are indicated.  
937  
938

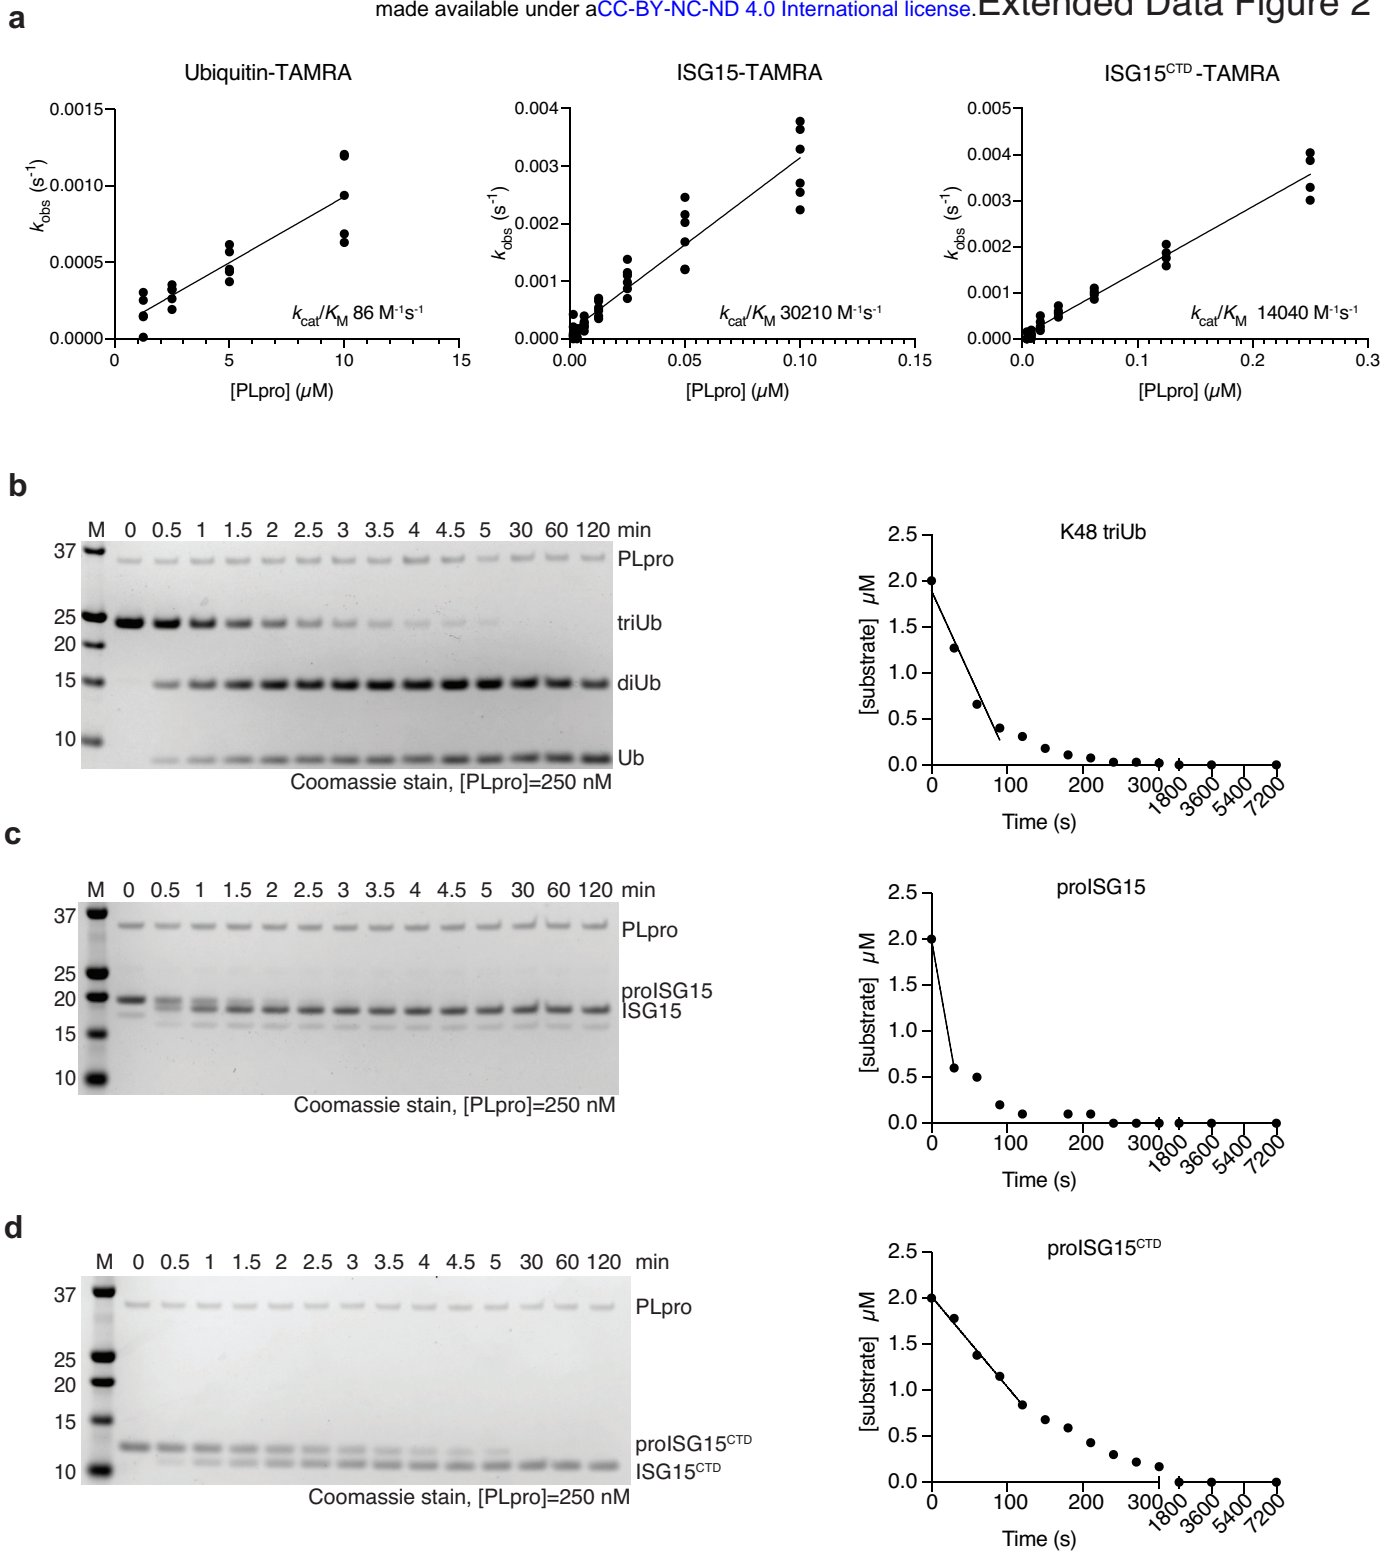

939 **Extended Data Figure 2. Gel-based kinetics and catalytic efficiency.**

940 **a**, Raw data of **Figure 1b** was used to calculate catalytic efficiency ( $k_{cat}/K_M$ ).  
941 Experiments were performed in technical triplicate and n=5 (Ub-TAMRA), n= 6  
942 (ISG15-TAMRA), n=4 (ISG15<sup>CTD</sup>-TAMRA) biological replicates. See **Methods** for  
943 further details. **b**, A monoubiquitin-based substrate, such as Ub-TAMRA, is an  
944 inefficient substrate for PLpro as the enzyme prefers longer Lys48-linked ubiquitin  
945 chains, which it binds via S1 and S2 sites<sup>20</sup>. Hydrolysis of triubiquitin into mono- and  
946 diubiquitin, hence enables a better estimation of the true ability of PLpro to target  
947 polyubiquitin (see **Figure 1c**). **b**, In order to quantify SARS2 PLpro activity,  
948 triubiquitin cleavage was followed over a time course, resolved on Coomassie-  
949 stained SDS-PAGE gels. The disappearance of triubiquitin was quantified by  
950 densitometry, plotted to the right. The linear part of the data, corresponding to an  
951 estimated observed catalytic rate ( $k_{obs}$ ), is indicated by a line. **c**, **d**, For direct  
952 comparison, hydrolysis of extended 'pro'-forms of human ISG15, in which the  
953 modifier is extended by 8 residues on the C-terminus, to the mature form sporting a  
954 free Gly156-Gly157 C-terminus, was analysed as in **b**, as previously described<sup>22</sup>.  
955 The loss of 8 residues can be visualised as a small shift in size by SDS-PAGE.  
956 Disappearance of the higher molecular weight band was quantified by densitometry  
957 and plotted on the right. The linear part of the curve was used to visually indicate  
958  $k_{obs}$ . Experiments were performed in duplicate and quantified as shown in  
959 **Supplementary Figure 1**.

960

961



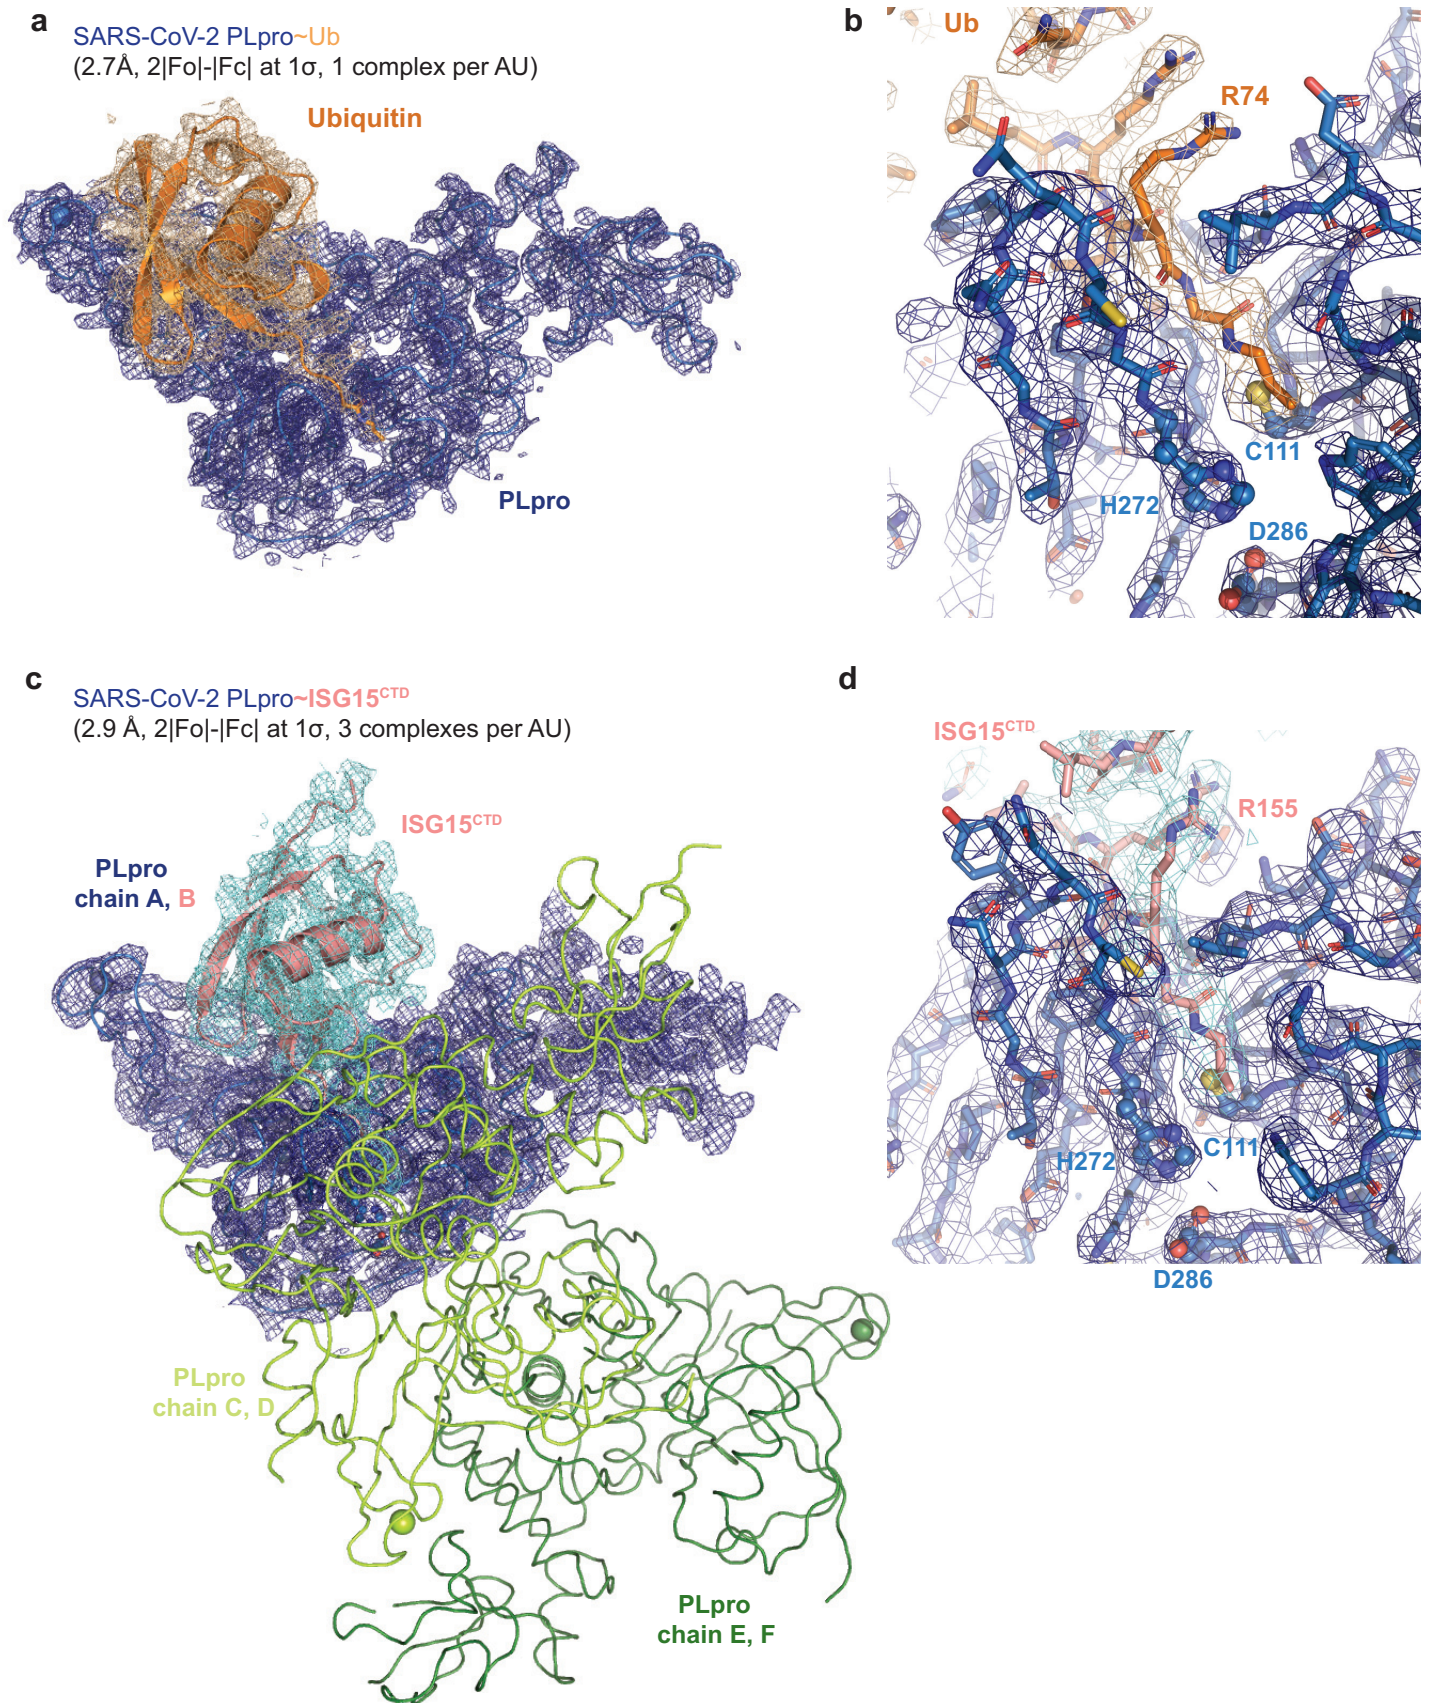



962 **Extended Data Figure 3. Electron density for PLpro complexes**

963 **a**,  $2|F_o|-|F_c|$  electron density, contoured at  $1\sigma$ , for the PLpro~Ub complex. The full  
964 asymmetric unit is shown. SARS2 PLpro is shown as a ribbon, and ubiquitin is  
965 shown in cartoon representation. **b**, Detailed electron density for the ubiquitin C-  
966 terminal tail in the active site, with the propargyl linked to catalytic Cys111. **c**,  $2|F_o|-$   
967  $|F_c|$  electron density, contoured at  $1\sigma$ , for the PLpro~ISG15<sup>CTD</sup> complex covering  
968 chain A (PLpro, ribbon) and B (ISG15<sup>CTD</sup>, cartoon). The remainder (chains C-F) of  
969 the asymmetric unit are shown as a ribbon without map. **d**, Detailed electron density  
970 for the ISG15 C-terminal tail in the active site, with the propargyl-linked to catalytic  
971 Cys111.

972

973

974

975

976

977

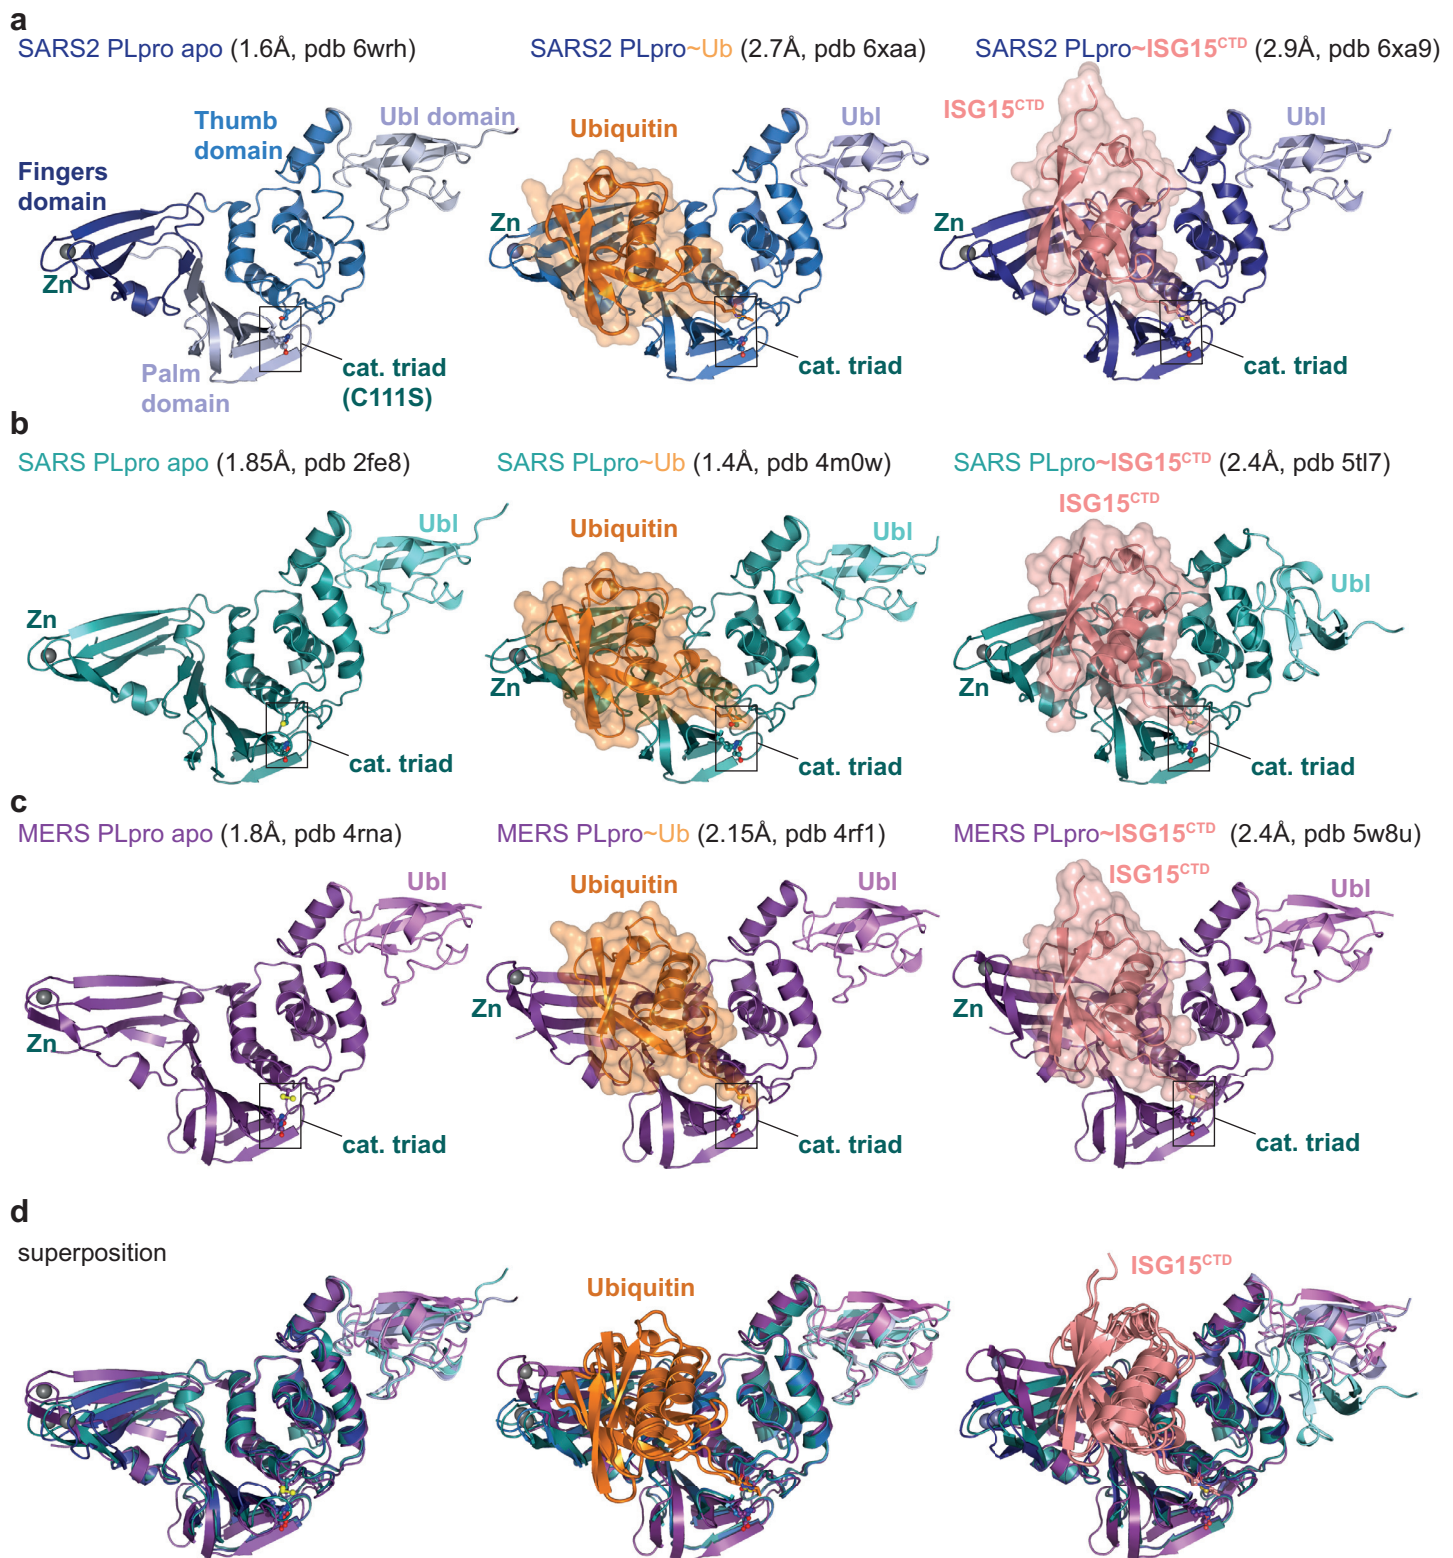

978 **Extended Data Figure 4. Selection of available structures of Coronavirus PLpro**

979 A large body of work on SARS and MERS PLpro has led to determination of multiple  
980 structures of PLpro apo and PLpro bound to ubiquitin and ISG15. A selection of  
981 structures is displayed, when multiple structures were available, the highest  
982 resolution structure was used.

983 **a**, *left*, the unpublished structure of apo SARS2 PLpro (pdb 6wrh, 1.6 Å, determined  
984 by the Centre for Structural Genomics of Infectious Disease (CSGID)) is coloured in  
985 analogy with **Figure 1d** and **Extended Data Fig. 1**, indicating Thumb, Fingers, and  
986 Palm subdomain. The PLpro fold forms an open right hand that holds the ubiquitin  
987 fold, guiding its C-terminus into the active site. PLpro contains an N-terminal Ubl  
988 domain of unknown function as the most structurally variable domain of PLpro. The  
989 high-resolution structure was generated with a catalytic Cys to Ser mutation. We  
990 found a more common Cys to Ala mutant of the catalytic Cys to result in highly  
991 unstable protein (**Extended Data Fig. 5d**). *Middle*, structure of SARS2 PLpro bound  
992 to ubiquitin (orange, covered by a semi-transparent surface). Also see **Figure 1**.  
993 *Right*, structure of SARS2 PLpro bound to the C-terminal domain of ISG15  
994 (ISG15<sup>CTD</sup>, salmon, under a semi-transparent surface). Also see **Figure 1**. In  
995 ubiquitin and ISG15<sup>CTD</sup> complexes, propargylamide based suicide probes <sup>41</sup>  
996 covalently modify catalytic Cys111. **b**, *left*, SARS PLpro apo (1.85 Å, pdb 2fe8, ref.  
997 <sup>56</sup>), *middle*, SARS PLpro bound to ubiquitin (1.4 Å, pdb 4m0w, ref. <sup>23</sup>), *right*, SARS  
998 PLpro bound to the C-terminal domain of ISG15 (2.4 Å, pdb 5tl7, <sup>25</sup>). **c**, *left*, MERS  
999 PLpro apo (1.84 Å, pdb 4rna, ref. <sup>32</sup>), *middle*, MERS PLpro bound to ubiquitin (2.15  
1000 Å, pdb 4rf1, ref. <sup>26</sup>), *right*, MERS PLpro bound to the C-terminal domain of ISG15  
1001 (2.4 Å, pdb 5w8u, ref. <sup>57</sup>).

1002 **d**, Superpositions of PLpro structures with S1 site occupied by different modifiers.  
1003 Overall, PLpro shows high similarity, extending to the position and orientation of the  
1004 N-terminal Ubl domain, with the notable exception of a distinct position of the Ubl in  
1005 the SARS complex with ISG15<sup>CTD</sup> (pdb 5tl7, <sup>25</sup>). The second, most variable region  
1006 concerns the Fingers subdomain, which shows varying degrees of ‘openness’.  
1007 Superposition shows that the structures of SARS and SARS2 bound to individual  
1008 modifiers are highly similar, and the modifiers adapt identical orientations and  
1009 engage in similar interactions with PLpro. MERS PLpro seems to vary on the theme  
1010 of ubiquitin versus ISG15 recognition, by binding both modifiers similarly. In the  
1011 MERS ubiquitin complex, the fingers are more closed, and the ubiquitin is pushed

1012 towards the Thumb domain, to adopt a similar orientation and interaction as seen for  
1013 ISG15 bound to MERS. MERS PLpro ubiquitin complexes have been determined  
1014 with 'open' and more 'closed' Fingers <sup>26</sup>.

1015

1016



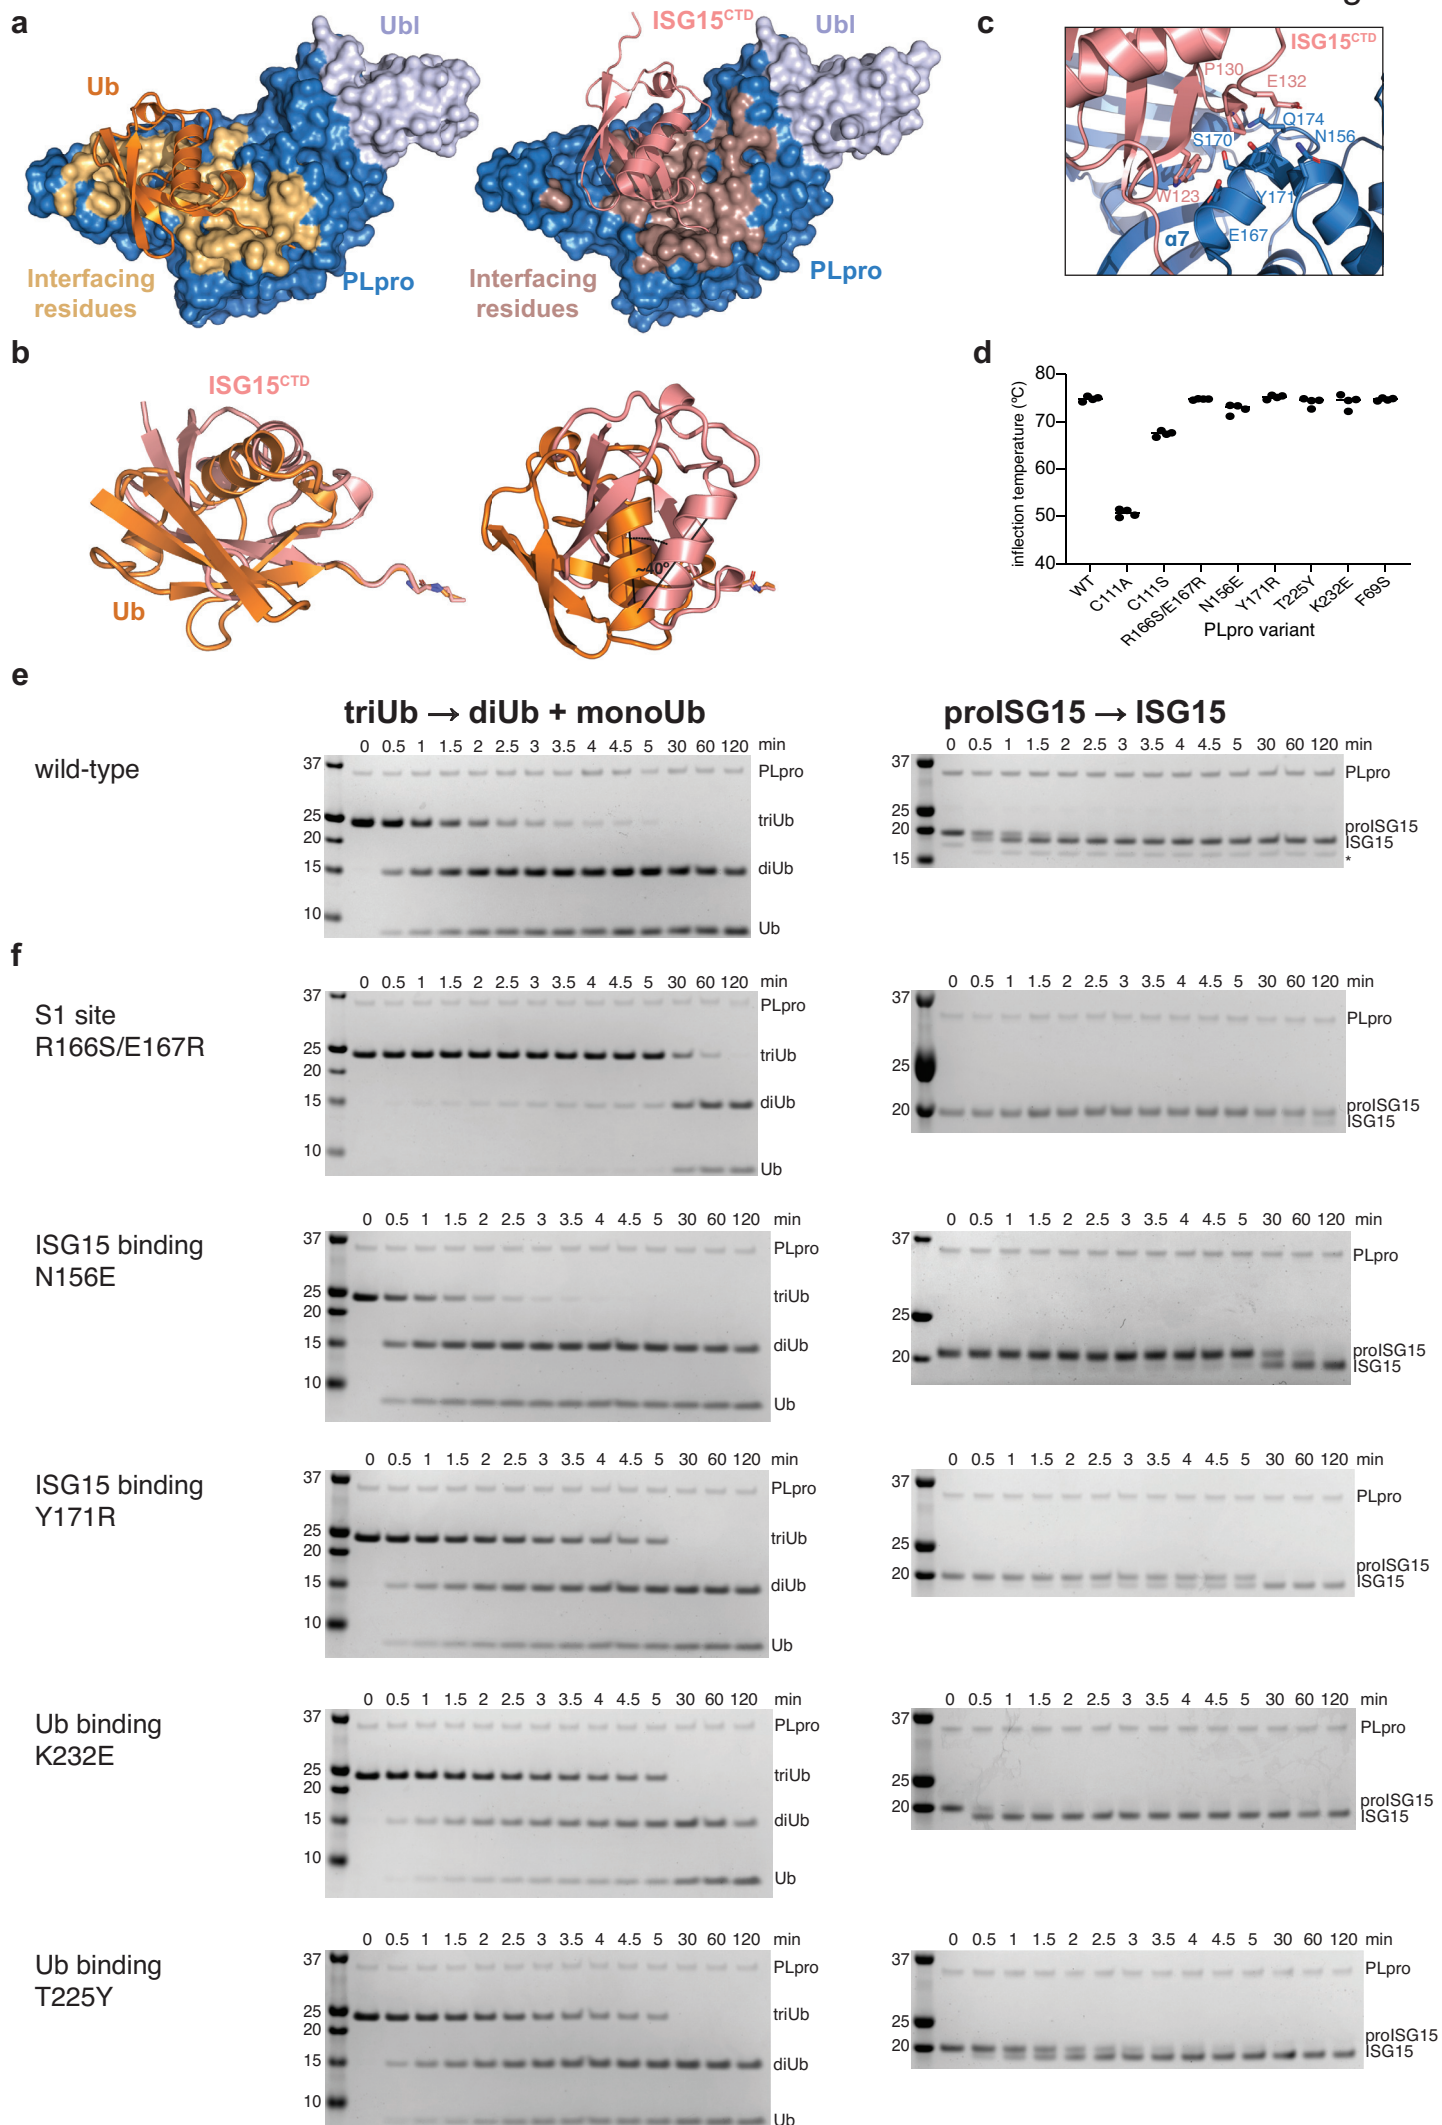

1017 **Extended Data Figure 5. Separation of function mutations in SARS2 PLpro**  
1018 **a**, Ubiquitin and ISG15 binding site analysis based on PISA analysis, indicating  
1019 interface residues on SARS2 PLpro. **b**, Superposition of Ub-PA (orange) and  
1020 ISG15<sup>CTD</sup>-PA (salmon) as bound to SARS2 PLpro highlights the different binding  
1021 modes with a ~40° rotation between the two proteins. **c**, Details of the binding of  
1022 ISG15<sup>CTD</sup> and the Thumb domain of SARS2 PLpro. Interacting residues shown as  
1023 sticks. **d**, Mutations in S1 and S2 sites were introduced in PLpro, and the enzyme  
1024 variants were expressed in bacteria, purified, and tested for integrity by assessing  
1025 the inflection temperature, indicating the transition of folded to unfolded protein. With  
1026 exception of mutating the catalytic Cys to Ala, which was severely destabilised and  
1027 precipitated during purification, all other mutants showed similar stability to wild-type  
1028 PLpro. Inflection temperature values were determined in technical duplicate from  
1029 experiments performed twice. **e**, **f**, Triubiquitin cleavage to mono- and diubiquitin  
1030 (*left*), and proISG15 cleavage to mature ISG15 (*right*), were compared side-by-side  
1031 over a time course, resolved on SDS-PAGE gels, and visualised by Coomassie  
1032 staining. Experiments were performed in duplicate with 250 nM enzyme and 2 µM  
1033 substrate; all gels are shown in **Supplementary Figure 1**. **c**, Activity of wild-type  
1034 PLpro, reproduced from **Extended Data Fig 2b, 2c**, for comparison. **d**, S1 site  
1035 mutants as indicated. See **Figure 2**.

1036



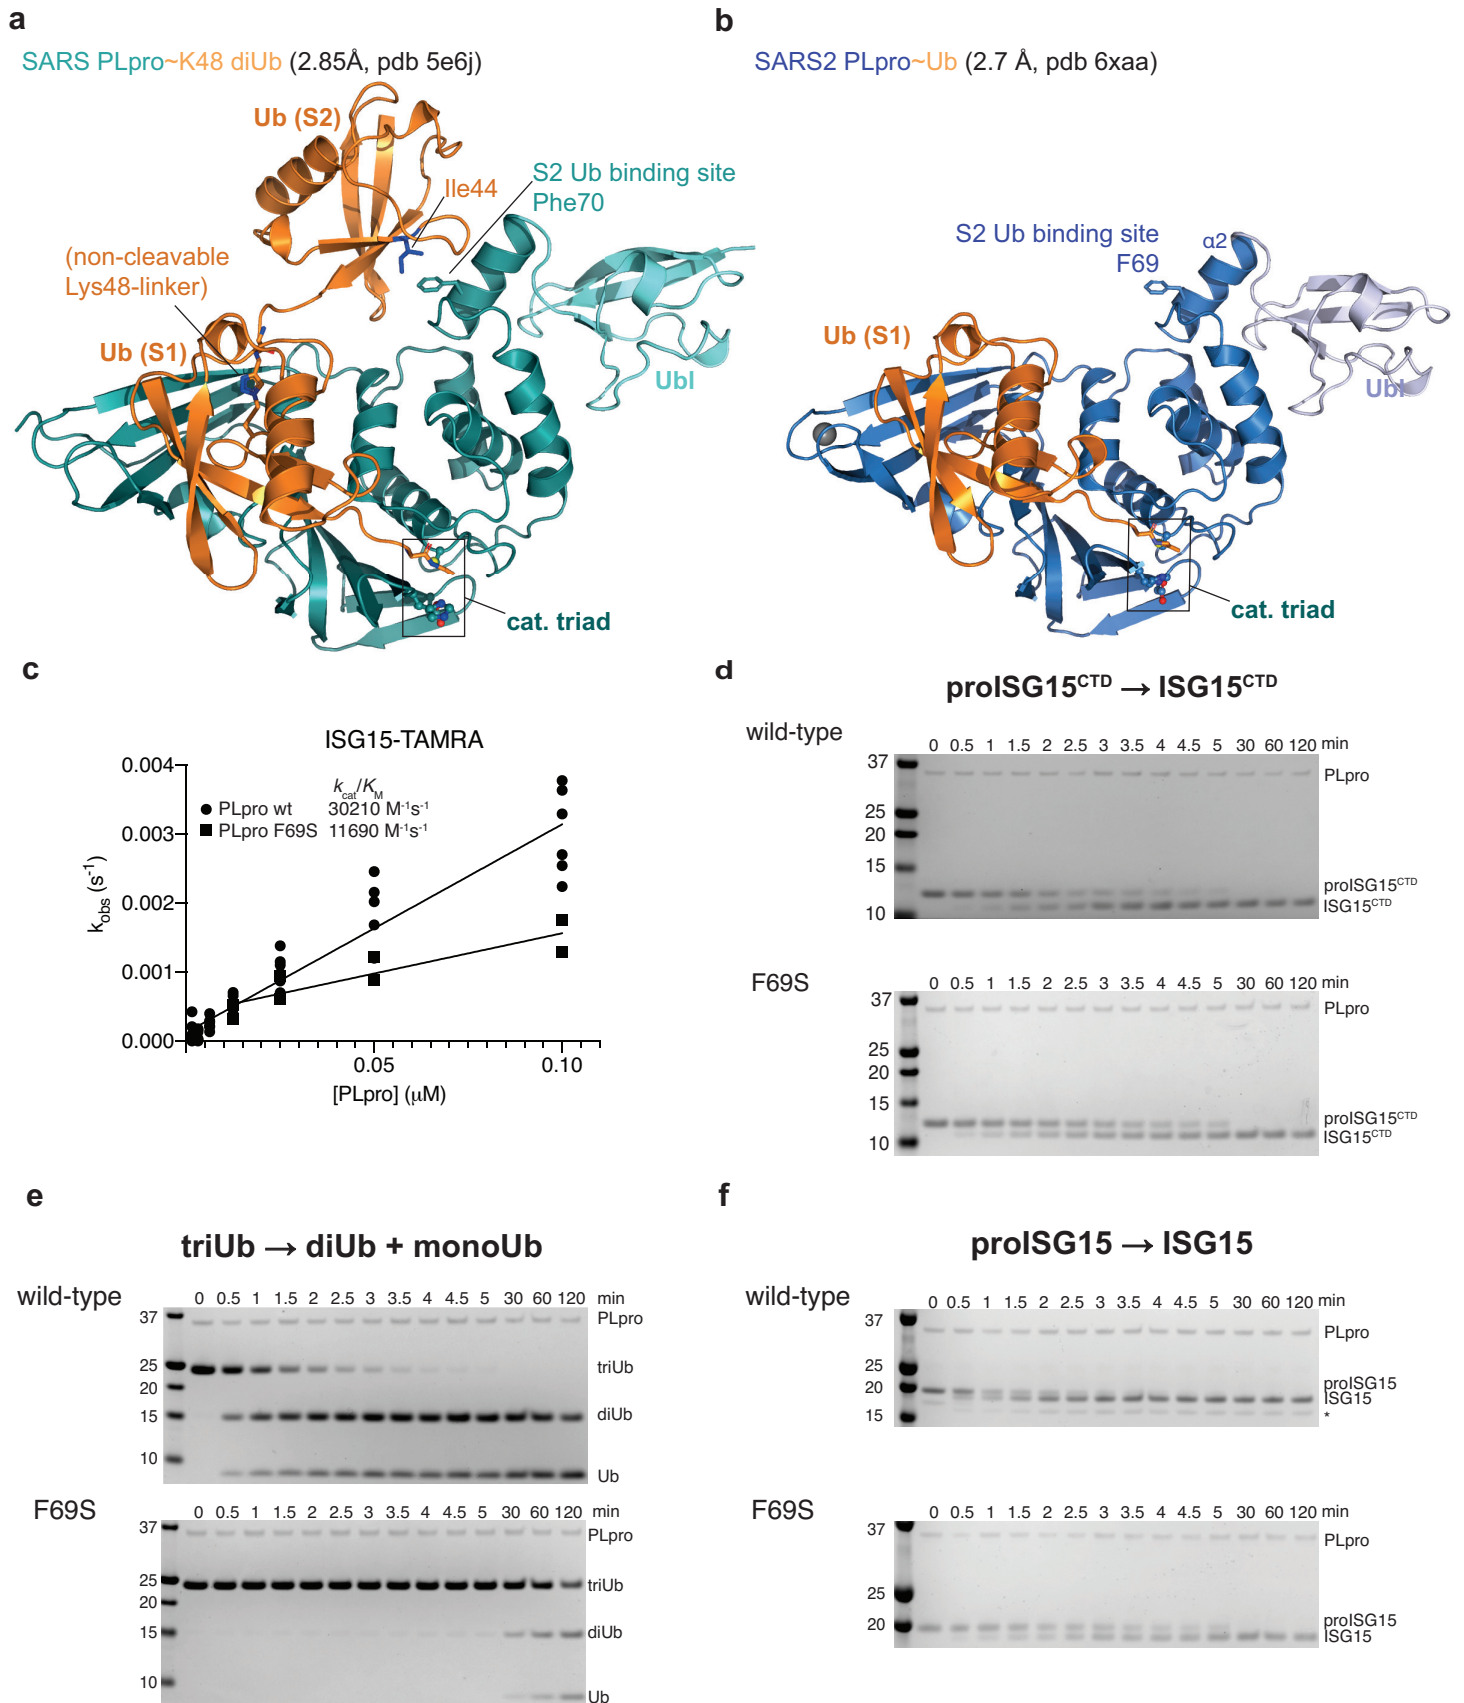

1037 **Extended Data Figure 6. The S2 site in SARS2 PLpro**

1038 **a**, A previous structure of SARS PLpro bound to a non-hydrolysable, Lys48-linked  
1039 diubiquitin probe (pdb 5e6j, <sup>20</sup>) explained the noted preference of PLpro for longer  
1040 Lys48-linked chains. While the proximal ubiquitin unit occupies the S1 site in a highly  
1041 similar fashion in SARS~Ub and SARS2~Ub structures (see **b, Figure 2a, Extended**  
1042 **Data Fig. 4**), the second, distal, ubiquitin unit binds to the  $\alpha 2$  helix of PLpro, through  
1043 a common binding mode involving the ubiquitin Ile44 patch. On helix  $\alpha 2$ , a central  
1044 Phe70 in SARS PLpro residue is flanked by residues involved in polar contacts.  
1045 **b**, Structure of the SARS2 PLpro~Ub complex. The S2 site consisting of  $\alpha 2$  helix  
1046 with Phe69 residue, is fully conserved in SARS2 PLpro. Mutation of Phe69 to Ser  
1047 severely impacts triubiquitin and proISG15 hydrolysis (see **Extended Data Fig. 5e**).  
1048 **c**, Fluorescence polarisation assay on ISG15-TAMRA for PLpro wild-type  
1049 (reproduced from **Extended Data Fig. 2a**) and PLpro F69S. A ~3-fold lower  
1050 efficiency for F69S is similar to cleavage of ISG15<sup>CTD</sup>-TAMRA (**Extended Data Fig.**  
1051 **2a**), suggesting that the S2 site contributes the difference in binding for the N-  
1052 terminal Ubl-fold. Experiments for F69S were performed in technical triplicate and  
1053 biological duplicate. **d-f**, Gel based analysis showing hydrolysis of proISG15<sup>CTD</sup> (**d**),  
1054 triubiquitin (**e**) and proISG15 (**f**) using wild-type PLpro (*top*, gels reproduced from  
1055 **Extended Data Fig. 2b-d** to enable direct comparison) or PLpro F69S (*bottom*).  
1056 Mutation of the S2 site has no marked effect on hydrolysis of proISG15<sup>CTD</sup> (**d**) and  
1057 reduces proISG15 cleavage to the same levels as proISG15<sup>CTD</sup> (compare **f** and **d**),  
1058 PLpro F69S has a dramatic effect on triubiquitin hydrolysis (**e**). Experiments were  
1059 performed in duplicate, see **Supplementary Figure 1**.

1060

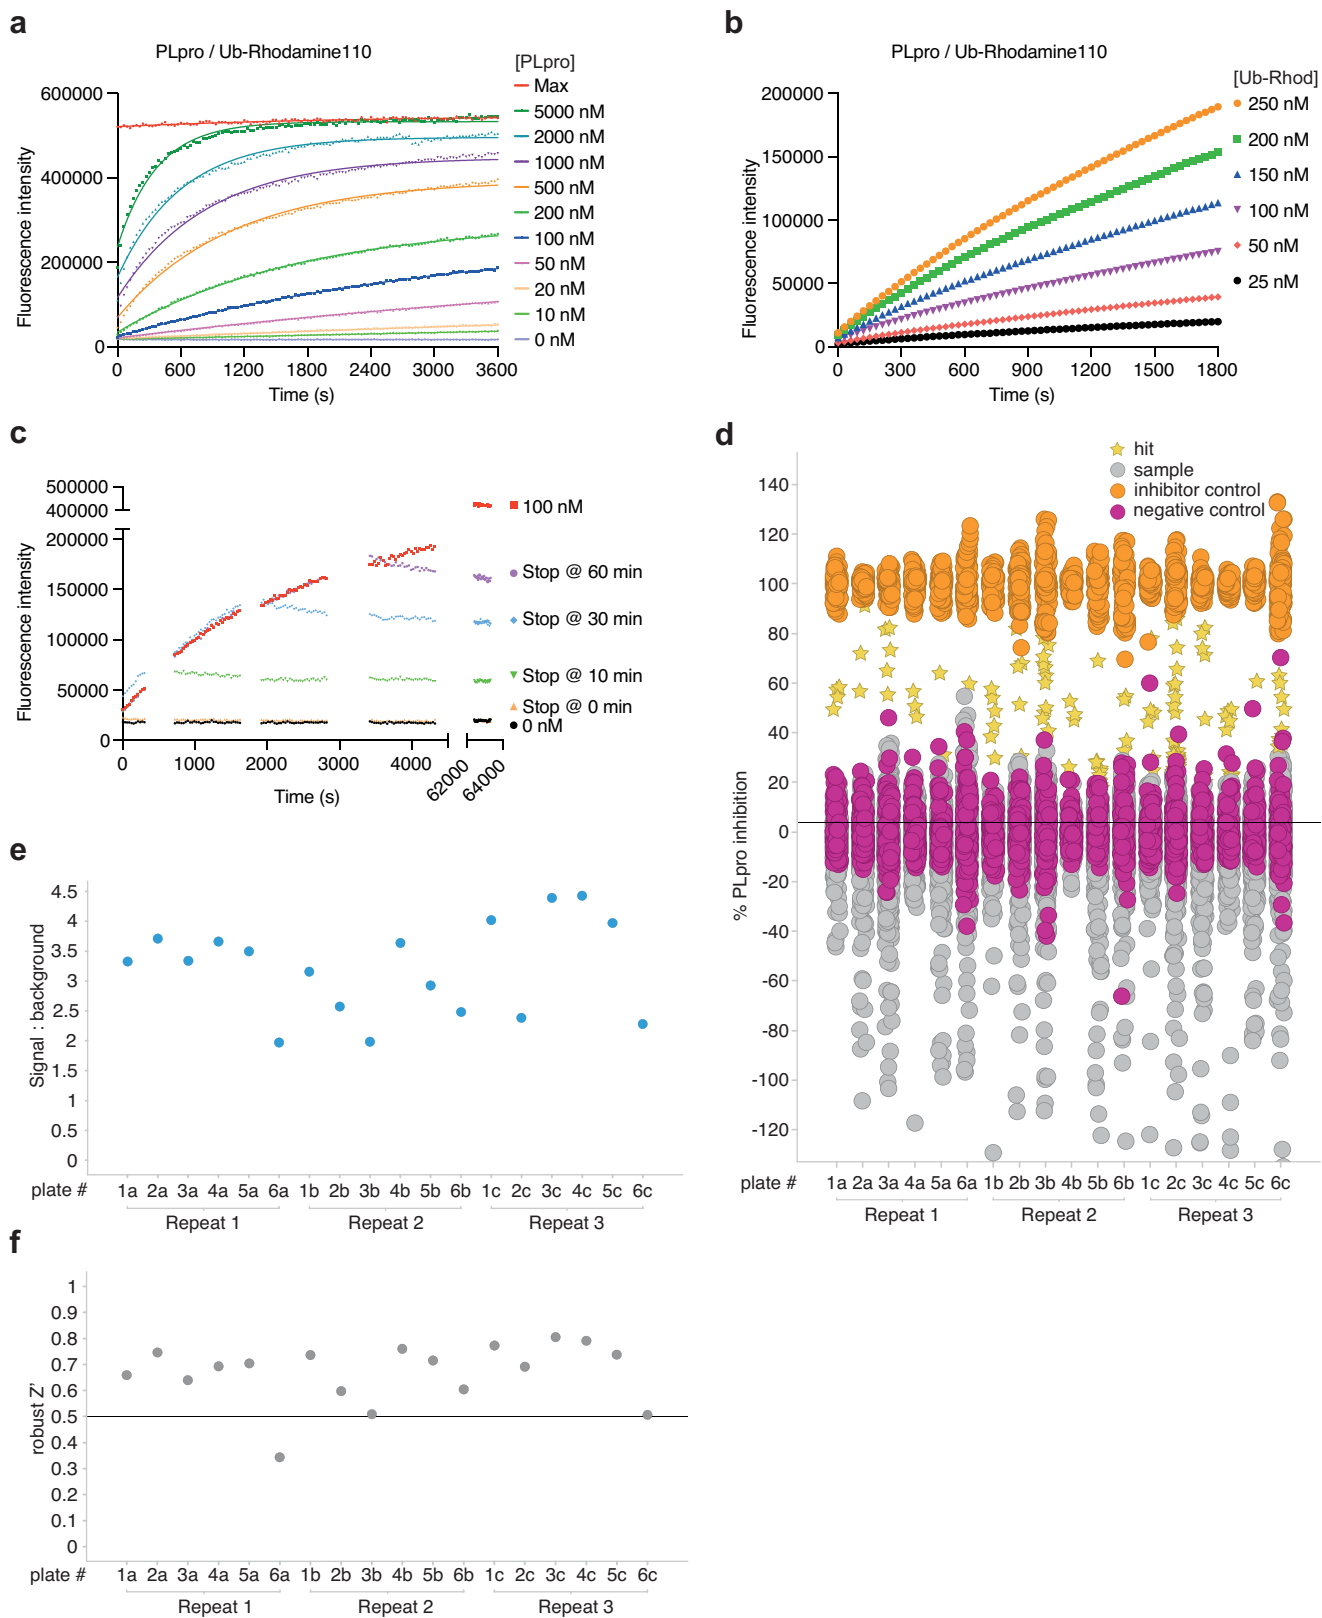

1061 **Extended Data Figure 7. Developing a high-throughput screen to identify**  
1062 **SARS2 PLpro inhibitors.**

1063 **a**, Suitable SARS2 PLpro concentrations were determined by kinetic analysis of  
1064 increasing Ub-Rhodamine fluorescence over 1 h (3600 s). Concentrations ranged  
1065 from 10-5000 nM with sufficient signal obtained with 50 nM SARS2 PLpro at a  
1066 constant concentration of 100 nM Ub-Rhodamine. Maximal signal (Max) indicates  
1067 pre-incubated Ub-Rhodamine with 25 nM PLpro for 1 h, to achieve complete  
1068 cleavage of Ub-Rhodamine, before measurement. **b**, To determine the optimal  
1069 substrate concentration, 50 nM SARS2 PLpro was incubated with 25-250 nM Ub-  
1070 Rhodamine for 30 min (1800 s). A final concentration of 100nM Ub-Rhodamine was  
1071 selected, which was well below  $K_M$  for SARS2 PLpro, in the linear range of the  
1072 reaction, with a signal to background (S:B) above 3 at 12 min (720 s). 12 min was  
1073 the timepoint selected for end-point assays. **c**, Enzymatic reactions were stopped  
1074 with addition of citric acid at a final concentration of 10 mM at indicated timepoints.  
1075 The assay was benchmarked against compound rac5c (see below, **Figure 4** and  
1076 **Extended Data Fig. 8**). Rac5c inhibited SARS2 PLpro activity with an  $IC_{50}$  of  
1077 0.81  $\mu$ M (**Figure 4c**, see **Methods, Supplementary HTS Information**). **d**, Results  
1078 from the complete screen, by plate number. **e**, Signal:background analysis from the  
1079 whole screen by plate number. 17 out of 18 plates met the quality control criteria  
1080 (S:B > 2). **f**, Robust  $Z'$  analysis of the whole screen by plate number. Plate 6a, which  
1081 did not meet quality criteria in S:B and robust  $Z'$  analysis, was excluded from  
1082 analysis.

1083

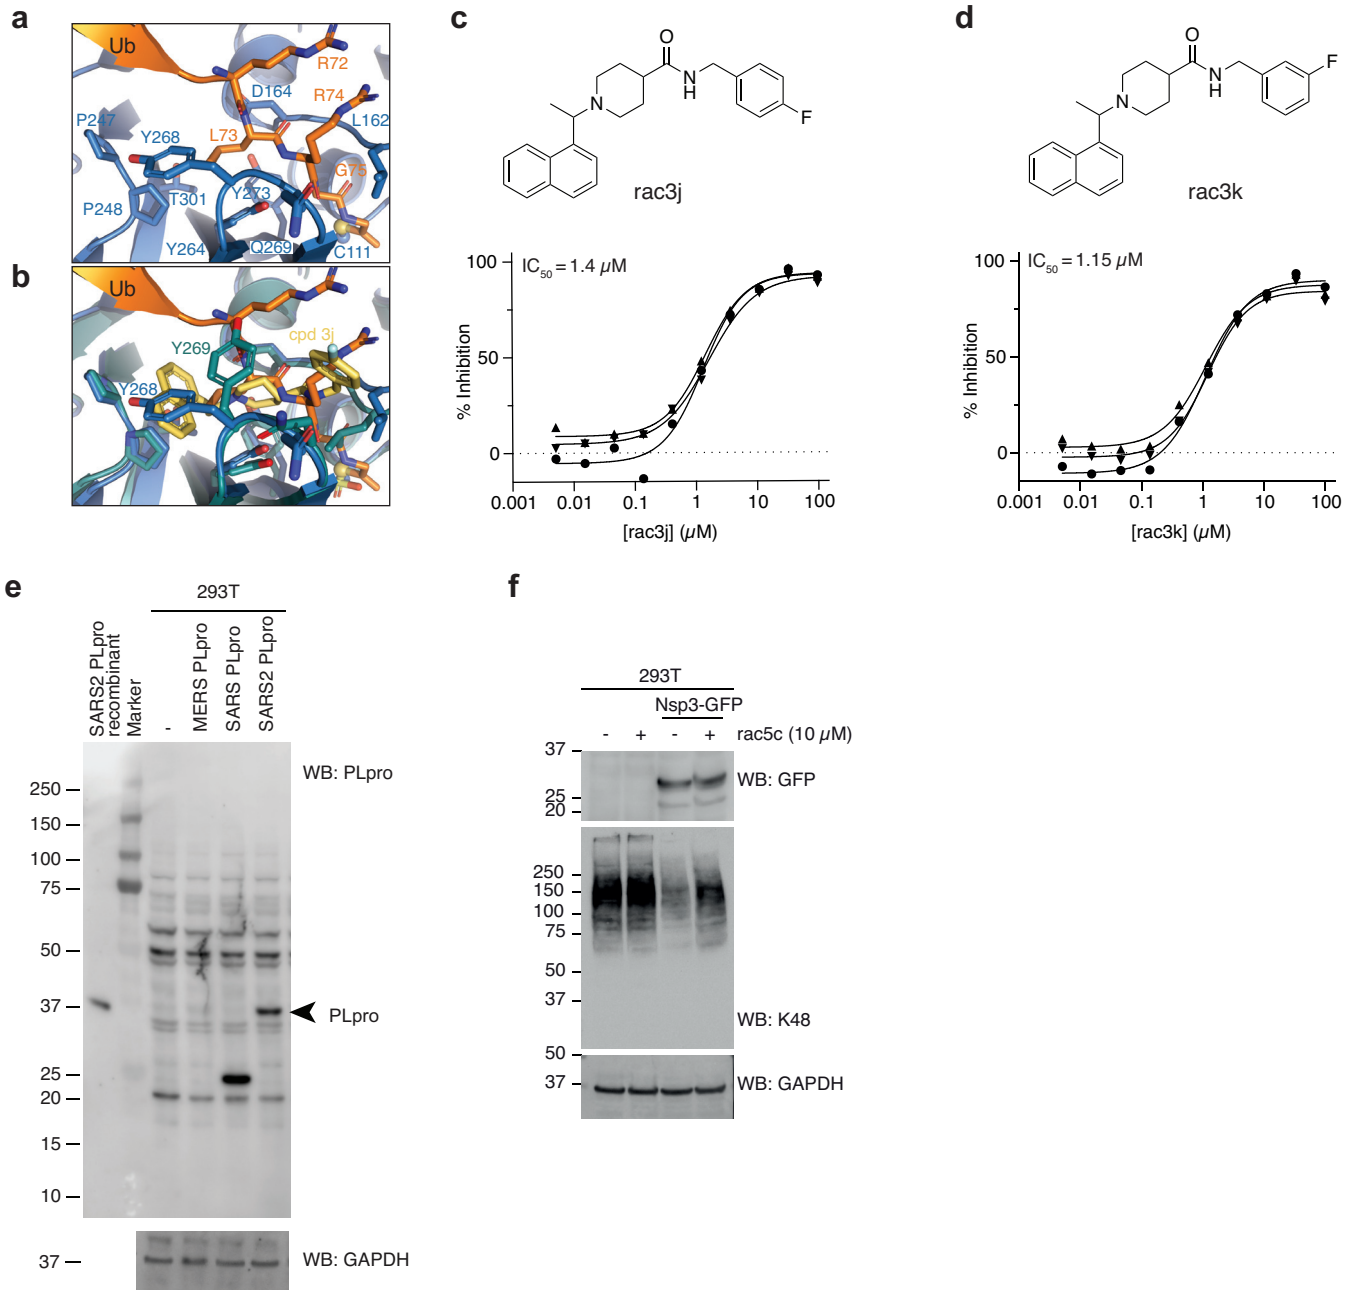

1084 **Extended Data Figure 8. SARS PLpro compounds inhibit SARS2 PLpro**  
1085 **a**, Structure of SARS2 PLpro bound to the ubiquitin C-terminal tail in the active site,  
1086 compare with **Figure 4a**. **b**, Superposition of ubiquitin tail in SARS2 PLpro, and  
1087 compound 3j in SARS PLpro (pdb 4ovz, <sup>29</sup>) shows an identical binding for  
1088 compounds in SARS2 PLpro and highlights the change in Tyr268/269 in SARS2  
1089 PLpro and SARS PLpro, respectively. **c**, **d**, Compounds rac3j and rac3k, racemic  
1090 versions of 3j and 3k from <sup>29</sup>, and their *in vitro* biochemical IC<sub>50</sub> values determined by  
1091 the HTS assay technical triplicate and in three independent experiments (as for  
1092 rac5c in **Figure 4c**). **e**, Immunoblot characterisation of the PLpro antibody on HEK  
1093 293T cells overexpressing PLpro from MERS, SARS or SARS2. Cell lysates were  
1094 immunoblotted 48 h post transfection. **f**, Immunoblot analysis showing the effect of  
1095 rac5c (10 µM for 24 h) on Lys48-polyubiquitin chain disassembly by nsp3, 48 h post  
1096 transfection in HEK 293T cells. Note that compounds have no effect on Lys48 chains  
1097 in untransfected HEK293T cells.  
1098



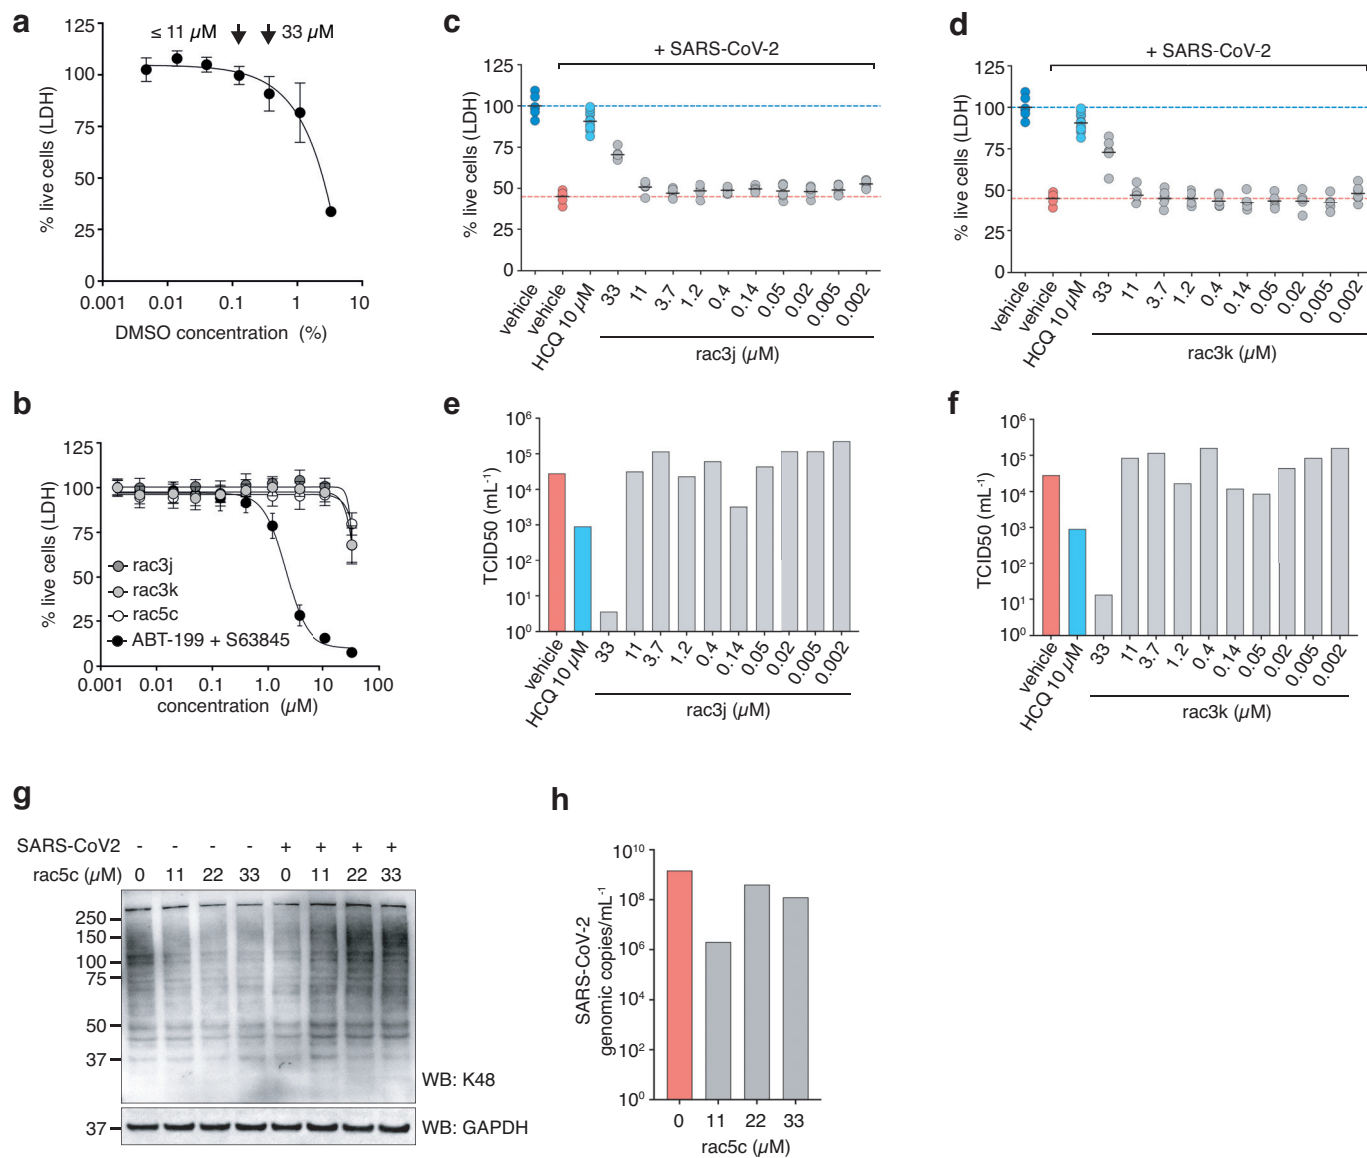

1099 **Extended Data Figure 9. Antiviral activity of compounds in cells.**

1100 **a**, Vero cells were tested for compatibility with DMSO concentrations, revealing low  
1101 toxicity at concentrations <0.1% (v/v) but more substantial cytotoxicity at higher  
1102 concentrations (0.3% and above). This limited the range of compound  
1103 concentrations useable for infection studies; at concentrations up to 11  $\mu$ M, 0.1%  
1104 (v/v) DMSO was used as vehicle, at 33  $\mu$ M compound concentration, 0.3% (v/v)  
1105 DMSO was used. Higher concentrations of compound could not be tested due to this  
1106 limitation. **b**, Toxicity titration of compounds rac3j, rac3k, and rac5c on Vero cells. At  
1107 33  $\mu$ M compound concentration, cellular toxicity is ~25%. ABT-199 and S63845 are  
1108 death-inducing compounds<sup>58,59</sup> used as a control. **c**, **d**, CPE assays to assess cell  
1109 killing activity of SARS-CoV-2 in Vero cells left untreated (DMSO control), or treated  
1110 with compounds rac3j (**c**) and rac3k (**d**). One experiment with 6 biological replicates  
1111 is shown (black line, mean), and compared to HCQ treated cells (10  $\mu$ M) with pooled  
1112 data from 2 experiments with n=6, as in **Figure 5b**. The 33  $\mu$ M compound  
1113 concentration was performed at 0.3% (v/v) DMSO and significantly rescued infected  
1114 cells despite underlying cytotoxicity in Vero cells (see **a,b**). **e**, **f**, TCID50 analysis of  
1115 infectious virus for rac3j, rac3k, from the experiments performed in **c** and **d**,  
1116 respectively. Data is representative of 1 experiment out of 2, with n=6 per  
1117 experiment, bars represent the mean TCID50 value. HCQ control was performed  
1118 within the same experiment. **g**, Calu3 cells were infected with SARS-CoV-2 and  
1119 treated 20 h post infection with increasing concentrations of rac5c for 4 h. Total cell  
1120 lysates were blotted for Lys48-polyubiquitin with a linkage specific antibody and  
1121 reprobred with for GAPDH as loading control. See **Supplementary Figure 1** for  
1122 uncropped blots. **h**, SARS-CoV-2 infected and rac5c treated Calu-3 cells were  
1123 sampled before lysis for Western blot analysis (for **g**) and RNA was extracted from  
1124 total cell lysate. Reverse transcribed cDNA was analysed for virus specific RNA by  
1125 qRTPCR (see **Methods**).

1126

1127

1128

1129

1130 **Extended Data Table 1. Data collection and refinement statistics.** Values in  
 1131 parentheses are for highest-resolution shell.

1132

|                                                     | SARS2 PLpro~Ub                           | SARS2 PLpro~ISG15 <sup>CTD</sup>         |
|-----------------------------------------------------|------------------------------------------|------------------------------------------|
| <b>Data collection</b>                              |                                          |                                          |
| Space group                                         | <i>P</i> 2 <sub>1</sub> 2 <sub>1</sub> 2 | <i>P</i> 4 <sub>1</sub> 2 <sub>1</sub> 2 |
| Cell dimensions                                     |                                          |                                          |
| <i>a</i> , <i>b</i> , <i>c</i> (Å)                  | 64.99, 144.41, 49.60                     | 124.17, 124.17, 238.17                   |
| <i>α</i> , <i>β</i> , <i>γ</i> (°)                  | 90.00, 90.00, 90.00                      | 90.00, 90.00, 90.00                      |
| Resolution (Å)                                      | 48.30 – 2.70 (2.83 – 2.70)               | 49.28 – 2.90 (3.01 – 2.90)               |
| <i>R</i> <sub>merge</sub> (within I+/I-)            | 0.152 (1.054)                            | 0.163 (2.876)                            |
| < <i>I</i> / <i>σ</i> <i>I</i> >                    | 6.8 (1.8)                                | 10.5 (1.1)                               |
| Completeness (%)                                    | 98.1 (98.9)                              | 100.0 (100.0)                            |
| Redundancy                                          | 4.6 (4.7)                                | 13.7 (14.2)                              |
| <b>Refinement</b>                                   |                                          |                                          |
| Resolution (Å)                                      | 48.30 – 2.70                             | 49.28 – 2.90                             |
| No. reflections                                     | 13004                                    | 42059                                    |
| <i>R</i> <sub>work</sub> / <i>R</i> <sub>free</sub> | 0.210/ 0.260                             | 0.200/ 0.231                             |
| No. atoms                                           |                                          |                                          |
| Protein                                             | 2986                                     | 8876                                     |
| Ligand/ion                                          | 5                                        | 63                                       |
| Water                                               | 32                                       | 30                                       |
| <i>B</i> -factors                                   |                                          |                                          |
| Protein                                             | 58.2                                     | 102.1                                    |
| Ligand/ion                                          | 53.1                                     | 101.7                                    |
| Water                                               | 45.8                                     | 77.9                                     |
| R.m.s. deviations                                   |                                          |                                          |
| Bond lengths (Å)                                    | 0.0024                                   | 0.0059                                   |
| Bond angles (°)                                     | 0.66                                     | 0.94                                     |

1133 All data sets were collected from a single crystal each. Values in parentheses are for highest-  
 1134 resolution shell.

1135  
 1136
