# Supplementary material for: Mechanism and inhibition of SARS-CoV-2 PLpro
Source: bioRxiv or medRxiv preprint supplement (doi:10.1101/2020.06.18.160614), 2020-06-19

Uncropped versions of SDS-PAGE gels

PLpro WT Ub  
chain specificity  
assays

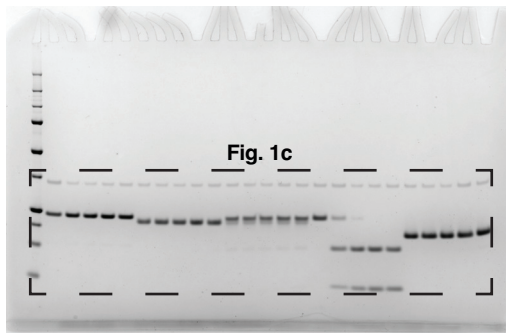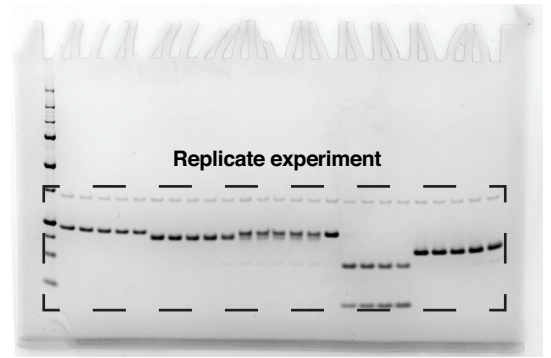

S1 site WT/Mts +  
K48 triUb kinetics  
comparison

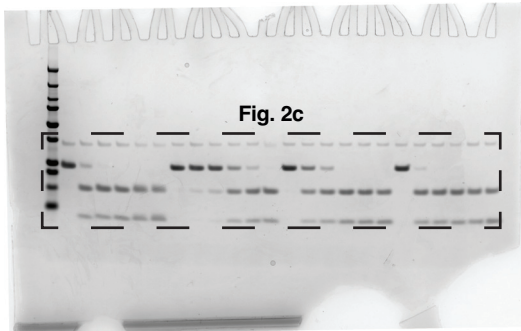

S1 site WT/Mts +  
proISG15 kinetics  
comparison

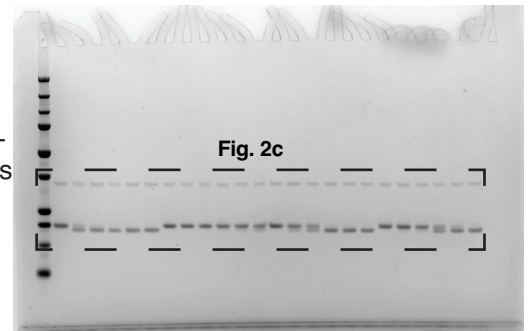

PLpro WT +  
K48 triUb  
kinetics assays

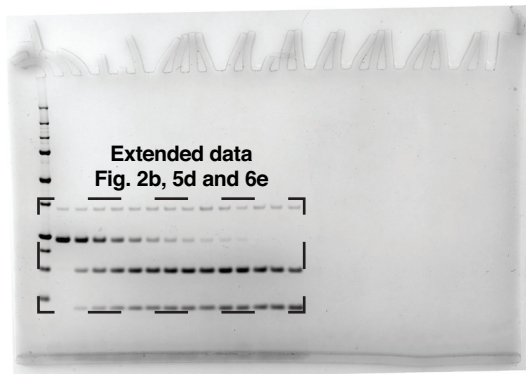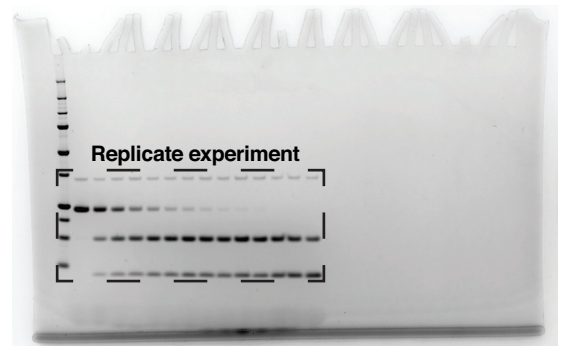

PLpro WT +  
proISG15  
kinetics  
assays

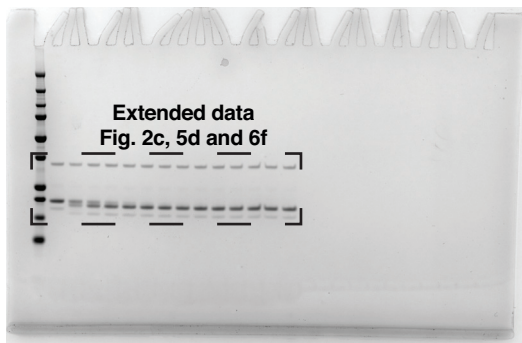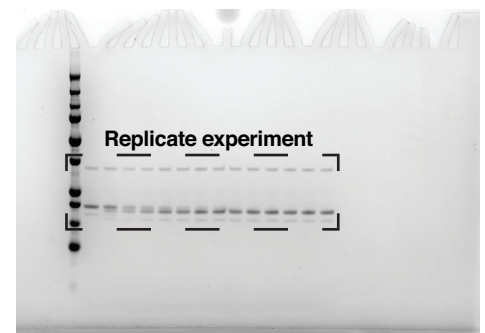

PLpro R166S/E167R  
+ K48 triUb kinetics  
assays

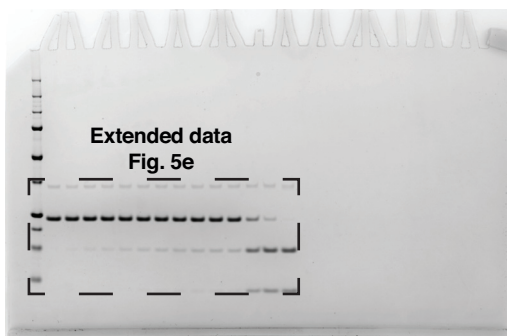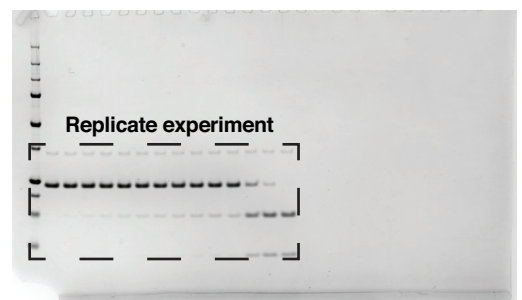

PLpro R166S/E167R +  
proISG15 kinetics assays

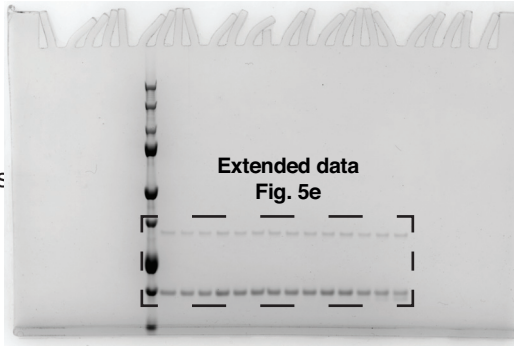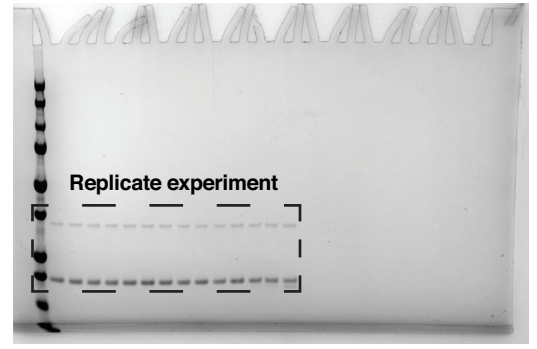

PLpro N156E +  
K48 triUb kinetics  
assays

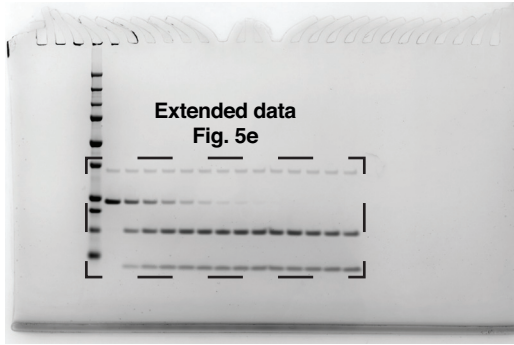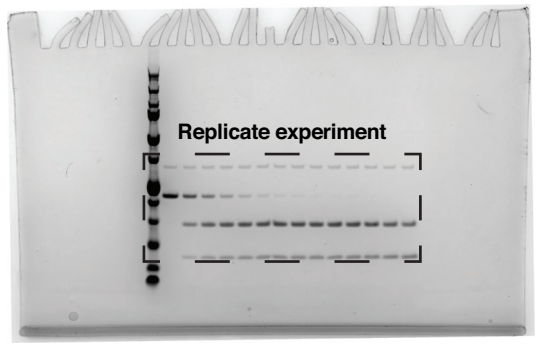

PLpro N156E +  
proISG15 kinetics  
assays

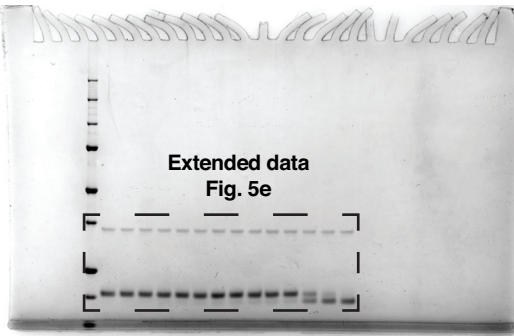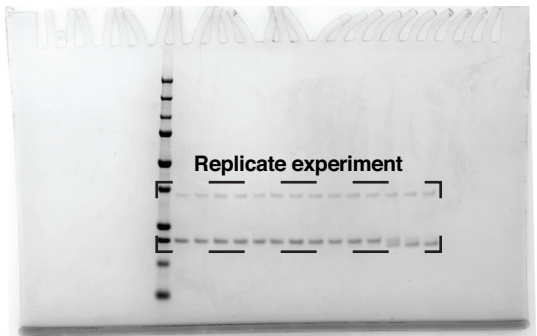

PLpro Y171R +  
K48 triUb kinetics  
assays

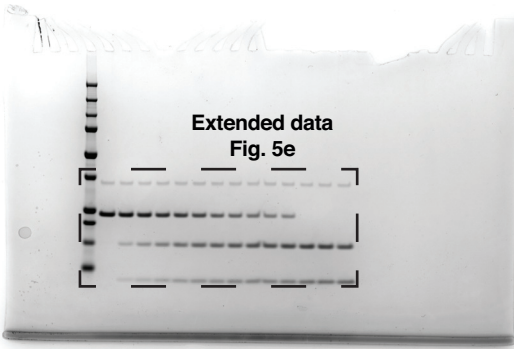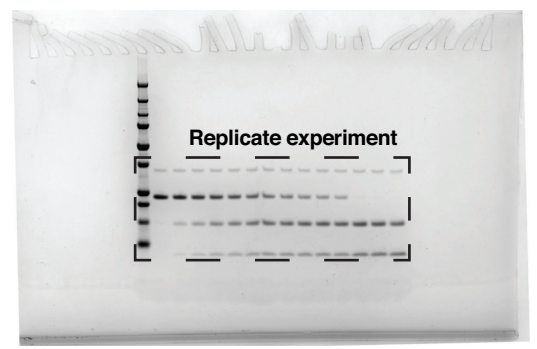

PLpro Y171R +  
proISG15 kinetics  
assays

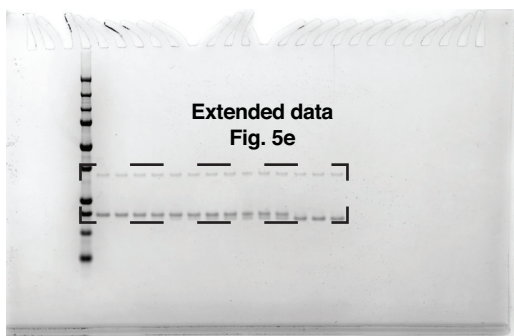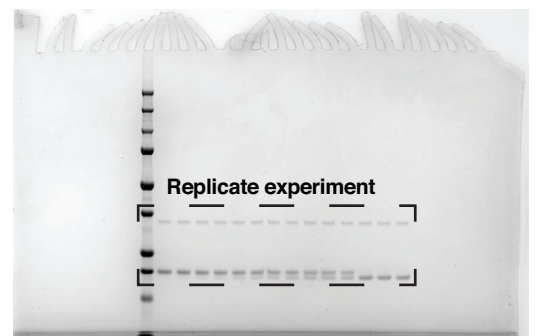

PLpro K232E +  
K48 triUb kinetics  
assay

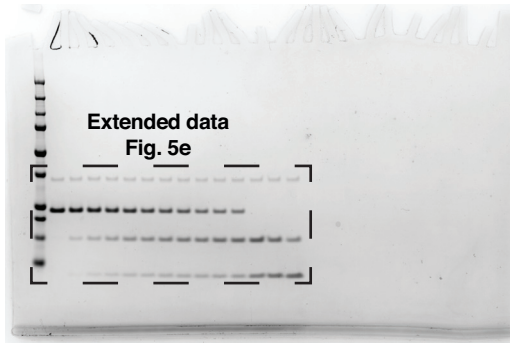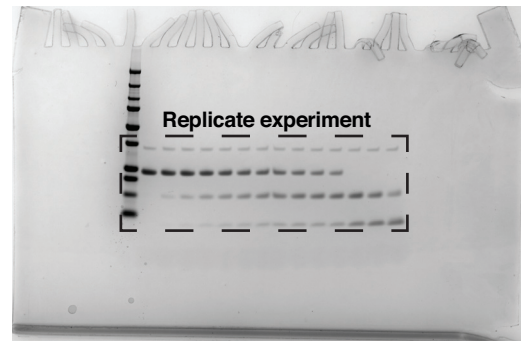

PLpro K232E +  
proISG15 kinetics  
assays

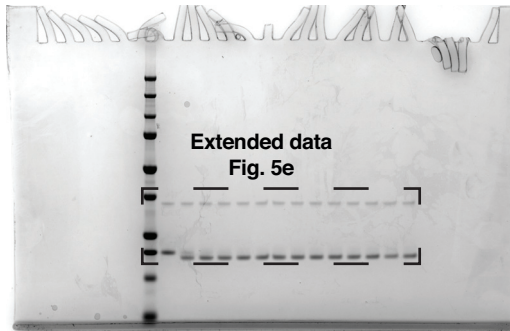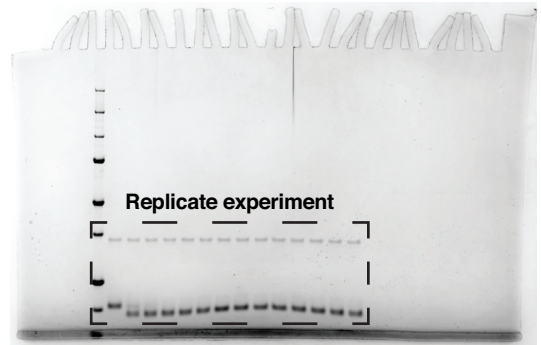

PLpro T225Y +  
K48 triUb kinetics  
assays

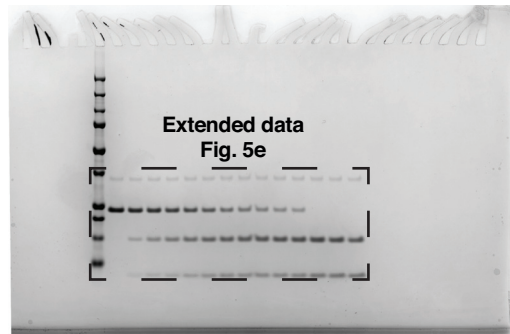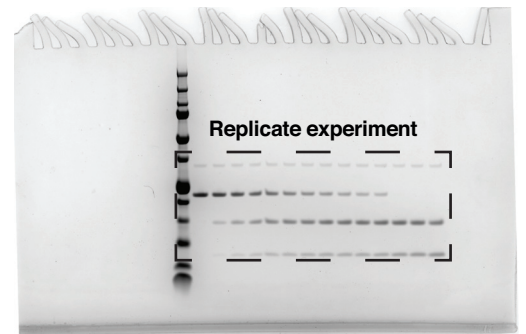

PLpro T225Y +  
proISG15 kinetics  
assays

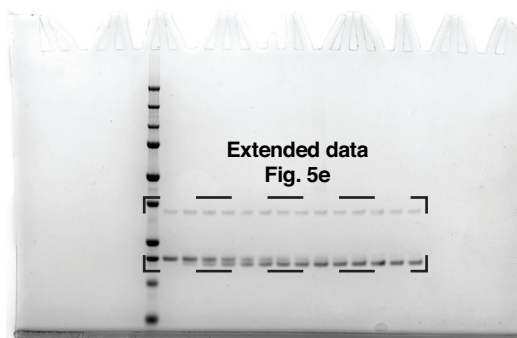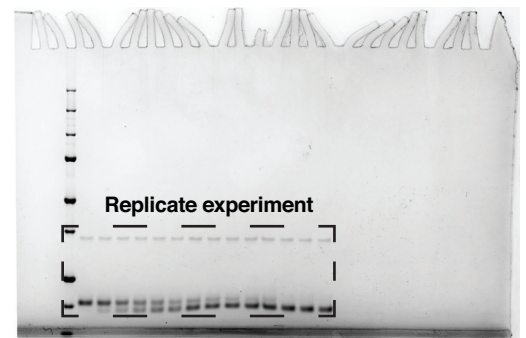

PLpro F69S +  
K48 triUb kinetics  
assays

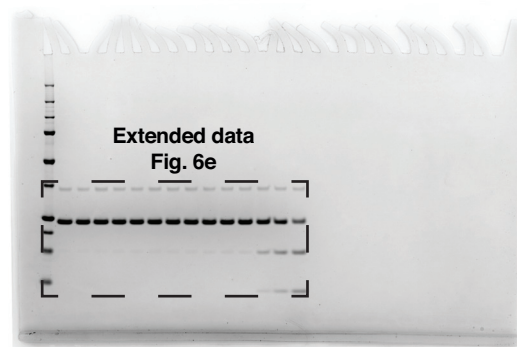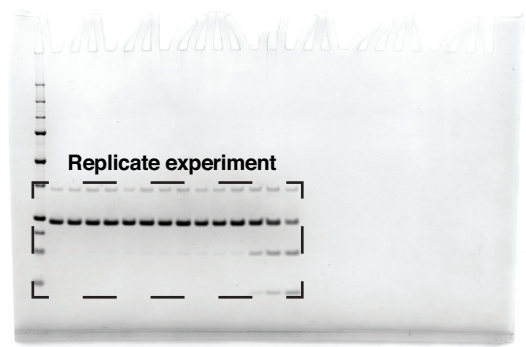

PLpro F69S +  
proISG15 kinetics  
assays

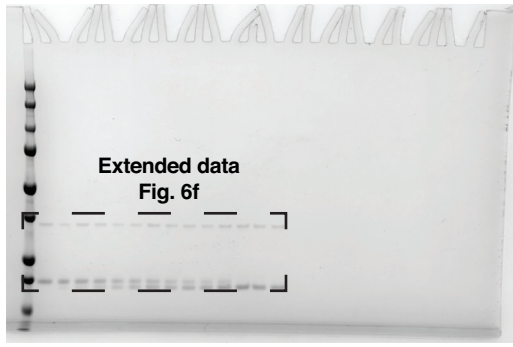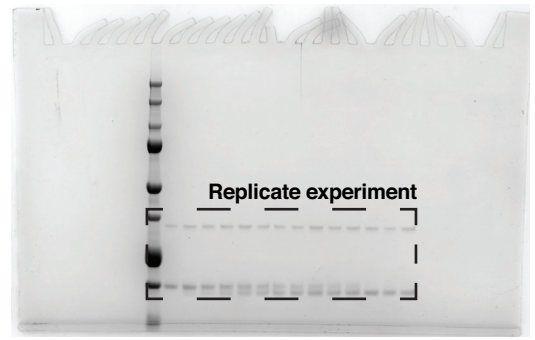

PLpro WT + ISG15<sup>CTD</sup>  
kinetics assays

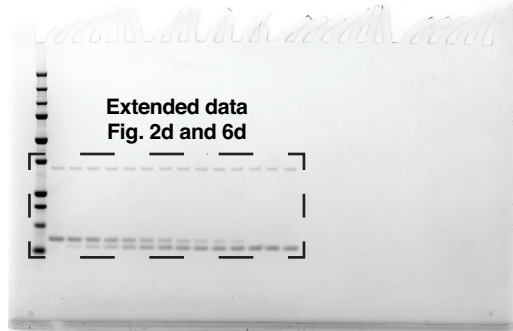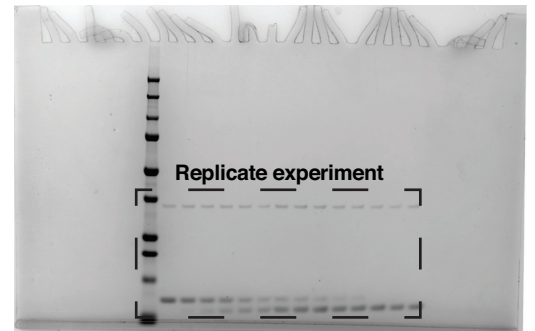

PLpro F69S +  
proISG15<sup>CTD</sup> kinetics  
assays

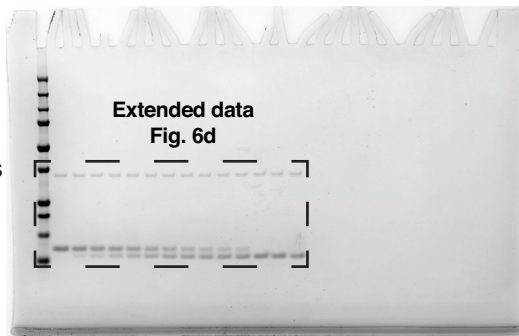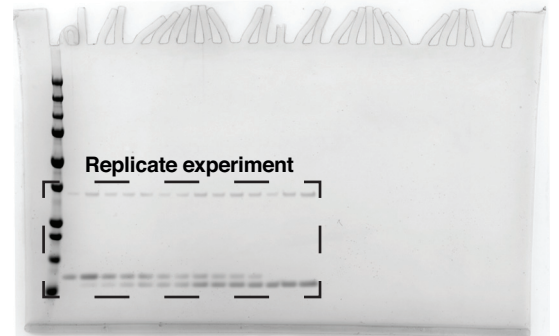

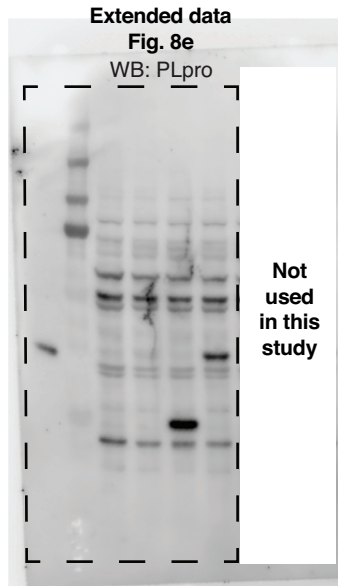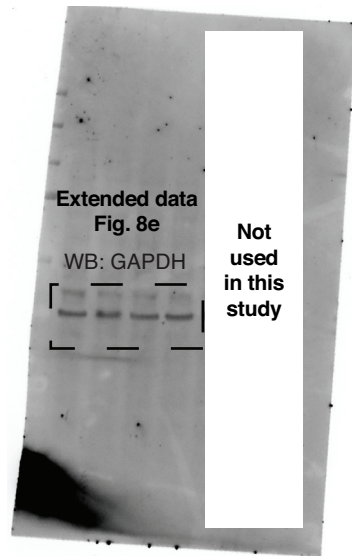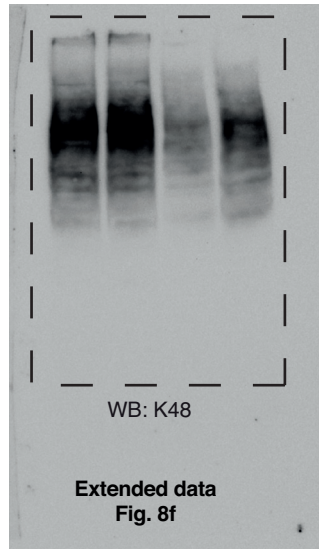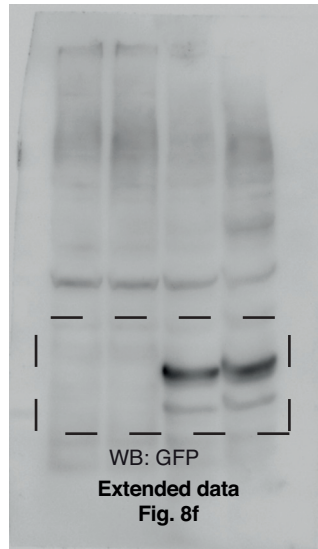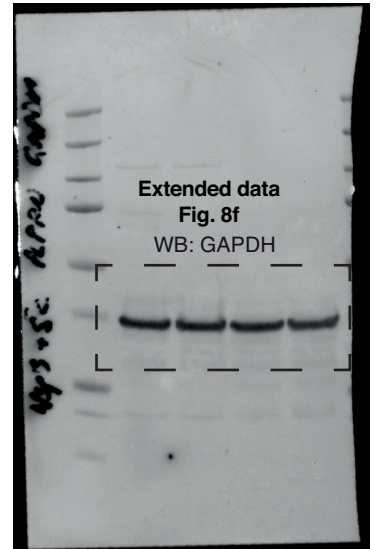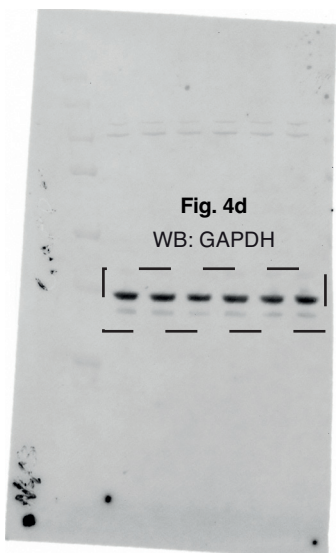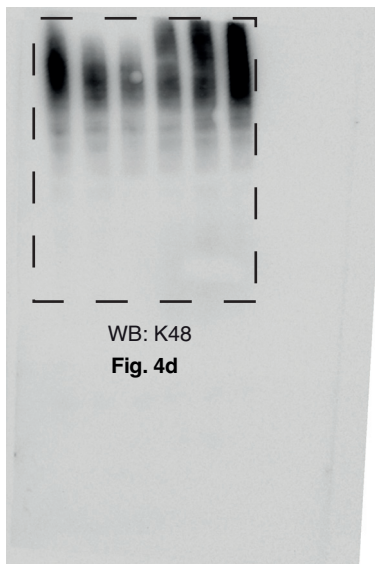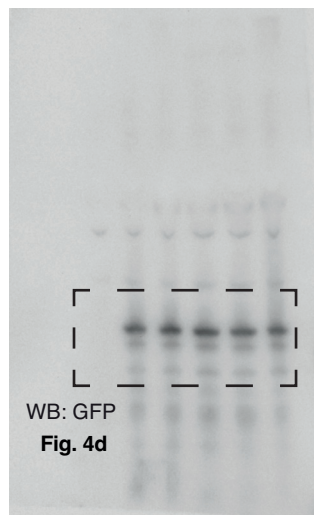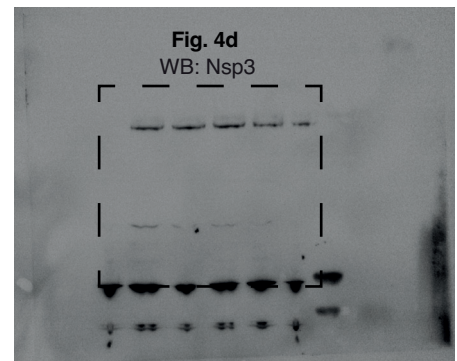

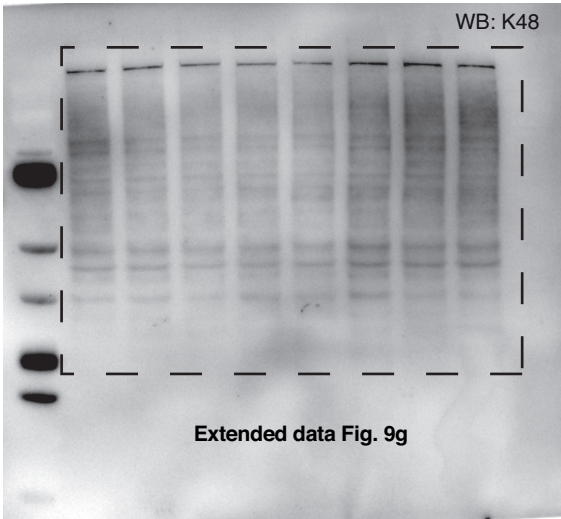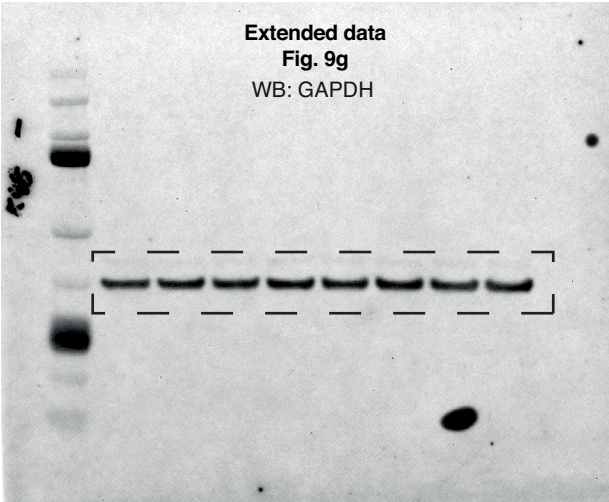

Supplement: Supplementary file [file media-2.pdf]
