# Supplementary material for: Mechanism and inhibition of SARS-CoV-2 PLpro
Source: bioRxiv or medRxiv preprint supplement (doi:10.1101/2020.06.18.160614), 2020-06-19
Supplement: Supplementary file [file media-1.pdf]

| Category          | Parameter                                | Description                                                                                    |
|-------------------|------------------------------------------|------------------------------------------------------------------------------------------------|
| Assay             | Type of assay                            | Enzymatic, endpoint                                                                            |
|                   | Target                                   | SARS-CoV-2 Papain-like Protease                                                                |
|                   | Primary measurement                      | Fluorescence intensity                                                                         |
|                   | Key reagents                             | Ub-Rhodamine                                                                                   |
| Library           | Library size                             | 5,576 compounds                                                                                |
|                   | Library composition                      | Small molecule, including FDA-approved drugs, advanced preclinical compounds and focused sets. |
|                   | Source                                   | Commercial and in-house curated collections (see Methods)                                      |
|                   | Additional comments                      |                                                                                                |
| Screen            | Format                                   | 1536 well plate                                                                                |
|                   | Concentration tested                     | 4.2 $\mu$ M in 2% DMSO                                                                         |
|                   | Plate controls                           | Negative control; 2% DMSO, positive control; compound rac5c (see manuscript, Figure 4)         |
|                   | Reagent/ compound dispensing system      | See Methods                                                                                    |
|                   | Detection instrument and software        | PHERASTAR FSX (BMG)                                                                            |
|                   | Assay validation/QC                      | Robust $Z'$ > 0.5                                                                              |
|                   | Hit criteria                             | >4*MAD above negative control                                                                  |
|                   | Hit rate                                 | 0.45%                                                                                          |
| Post-HTS analysis | Counter screen                           | Human USP21, Ub-Rhodamine                                                                      |
|                   | Additional assay(s)                      |                                                                                                |
|                   | Confirmation of hit purity and structure | LC/MS                                                                                          |
